# Supplementary material for: Photooxidation of thiosaccharides mediated by sensitizers in aerobic and environmentally friendly conditions
Source: Royal Society of Chemistry journal article supplement (doi:10.1039/d0ra09534f), 2021-01-01

Supporting Information for

## Photooxidation of Thiosaccharides Mediated by Sensitizers in Aerobic and Environmentally Friendly Conditions

Miqueas G. Traverssi<sup>[a,b]</sup>, Alicia B. Peñéñory<sup>[a,b]</sup>, Oscar Varela<sup>[c,d]</sup> and Juan P. Colomer<sup>[a,b]\*</sup>

<sup>a</sup>Universidad Nacional de Córdoba. Facultad Ciencias Químicas, Departamento de Química Orgánica. Ciudad Universitaria, Edificio de Ciencias II, Córdoba, Argentina.

<sup>b</sup>Consejo Nacional de Investigaciones Científicas y Técnicas (CONICET)-UNC Instituto de Investigaciones en Fisico-Química de Córdoba (INFIQC).

<sup>c</sup>Universidad de Buenos Aires. Facultad Ciencias Exactas y Naturales, Departamento de Química Orgánica. Ciudad Universitaria, Pab. 2, C1428EHA, Buenos Aires, Argentina.

<sup>d</sup>Consejo Nacional de Investigaciones Científicas y Técnicas (CONICET)-UBA Centro de Investigación en Hidratos de Carbono (CIHIDECAR).

### Index

|                                                                                           |         |
|-------------------------------------------------------------------------------------------|---------|
| <sup>1</sup> H, <sup>13</sup> C NMR Spectra of acetyl thiosaccharides <b>3a-f</b> .....   | S2-S7   |
| <sup>1</sup> H, <sup>13</sup> C NMR Spectra of free thiosaccharides <b>3g-k</b> .....     | S8-S12  |
| <sup>1</sup> H, <sup>13</sup> C, NOESY NMR Spectra of acetyl sulfoxides <b>4a-d</b> ..... | S13-S20 |
| <sup>1</sup> H, <sup>13</sup> C, NOESY NMR Spectra of free sulfoxides <b>4g-i</b> .....   | S20-S24 |
| Oxidation reaction of free thiosaccharide <b>3i</b> peracetylated .....                   | S25     |

# <sup>1</sup>H NMR of compound 3a

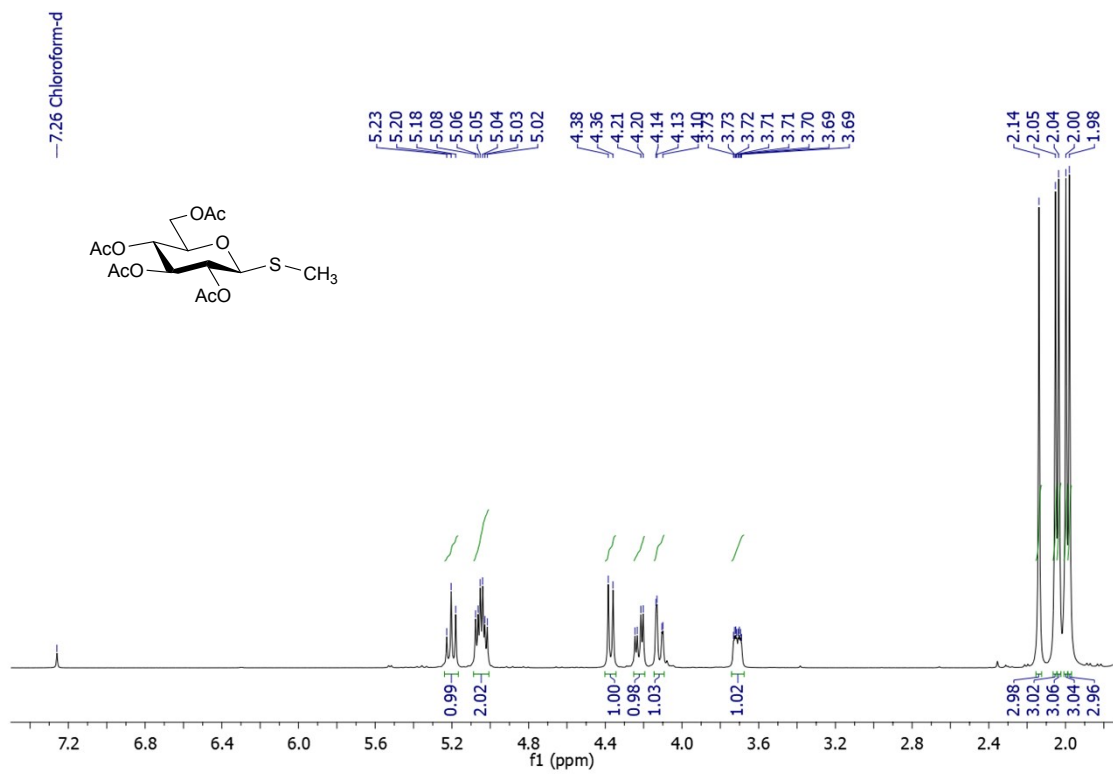

# <sup>13</sup>C NMR of compound 3a

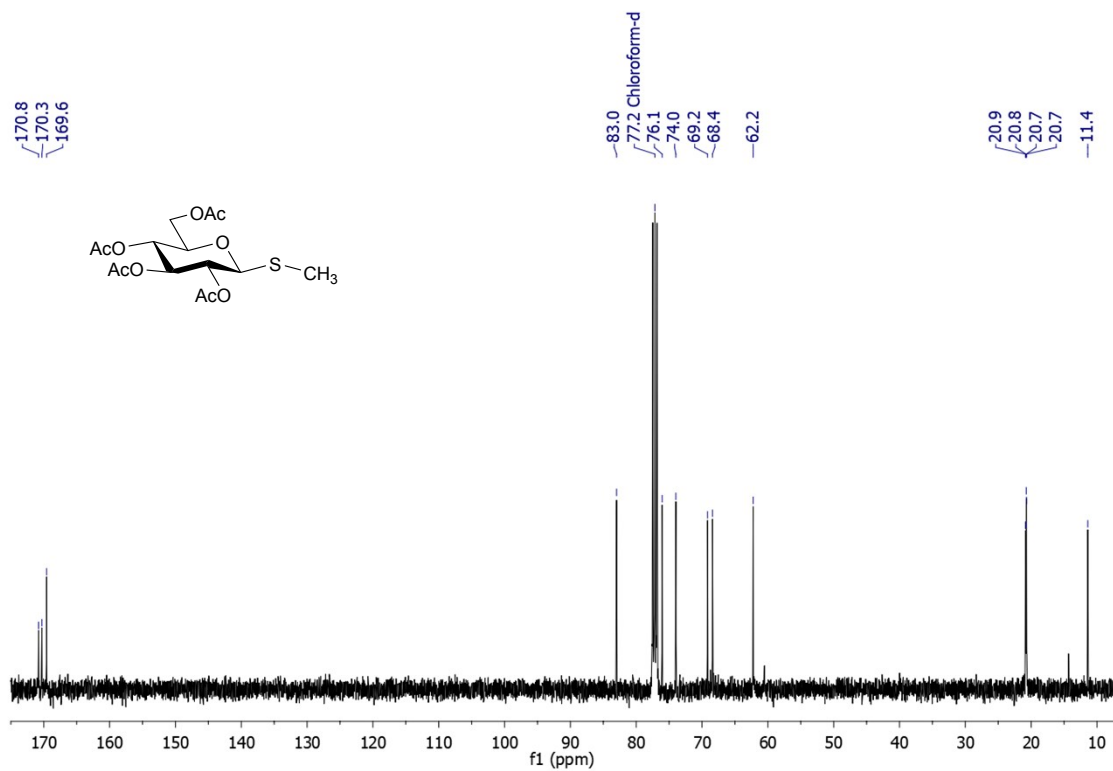

# <sup>1</sup>H NMR of compound **3b**

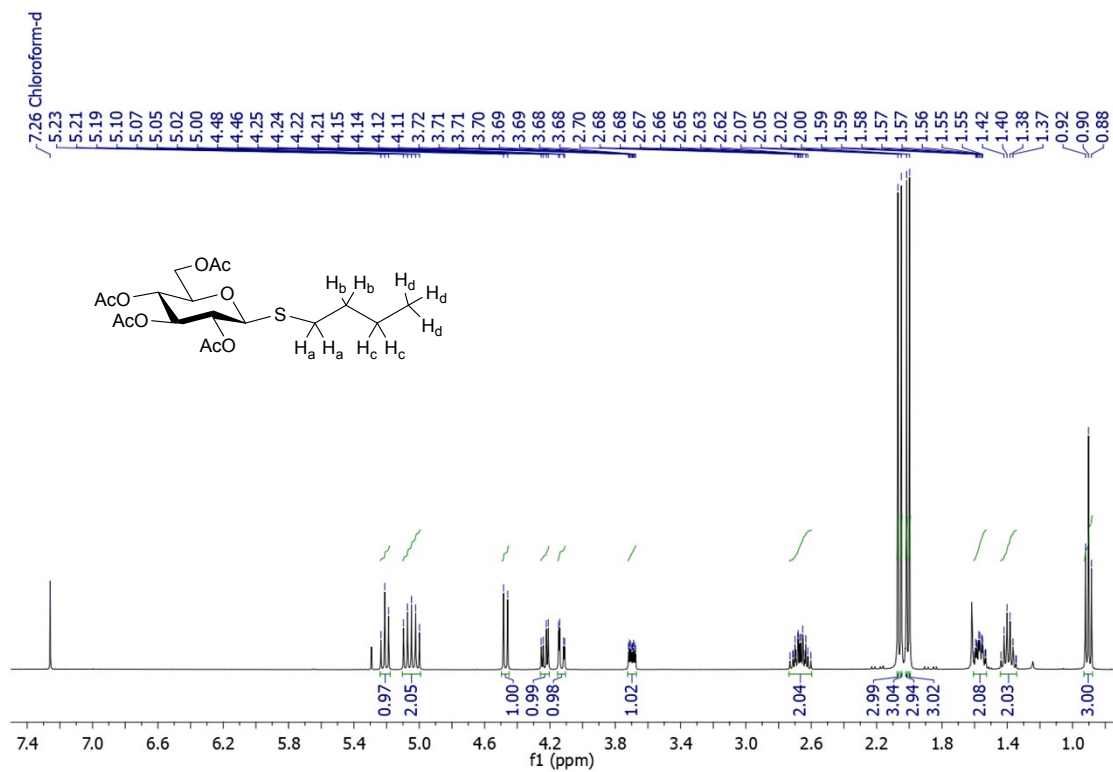

# <sup>13</sup>C NMR of compound **3b**

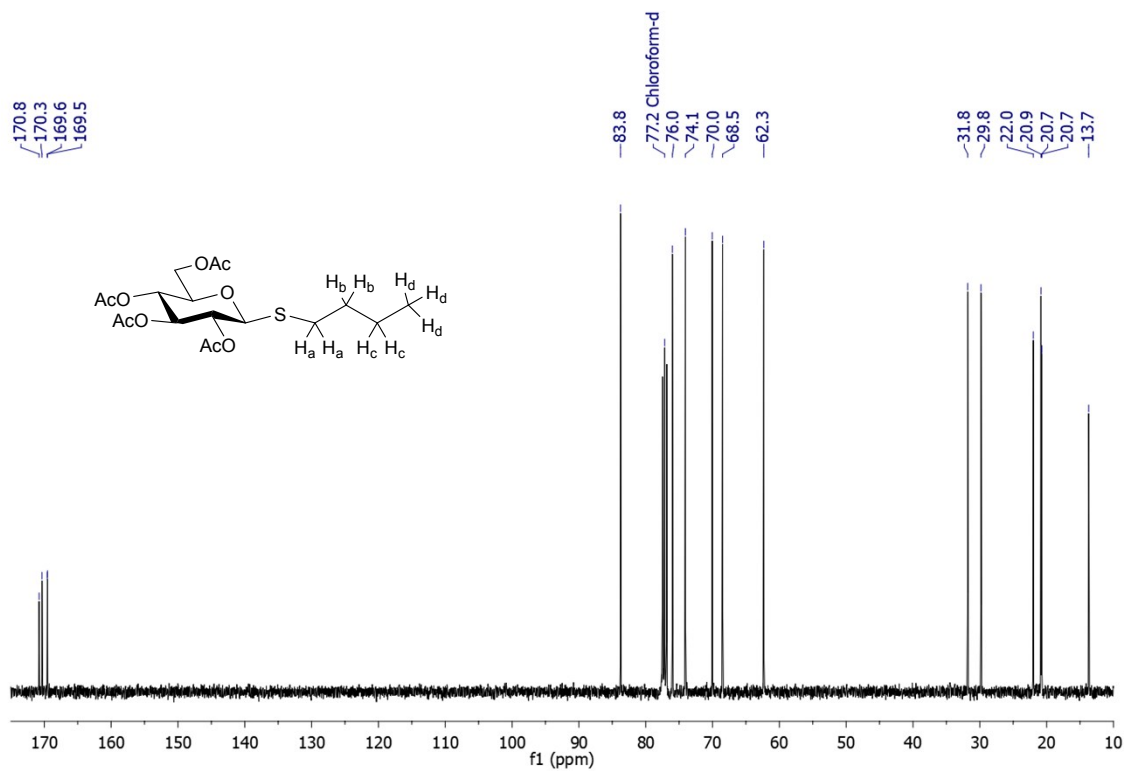

# <sup>1</sup>H NMR of compound 3c

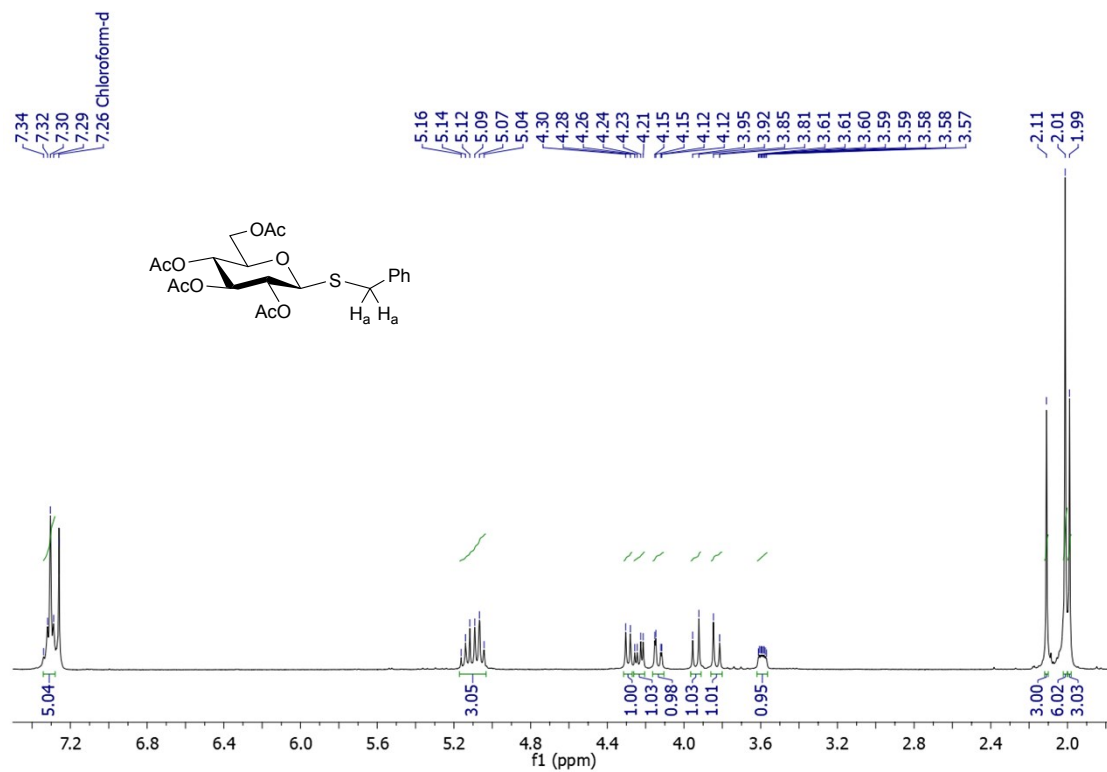

# <sup>13</sup>C NMR of compound 3c

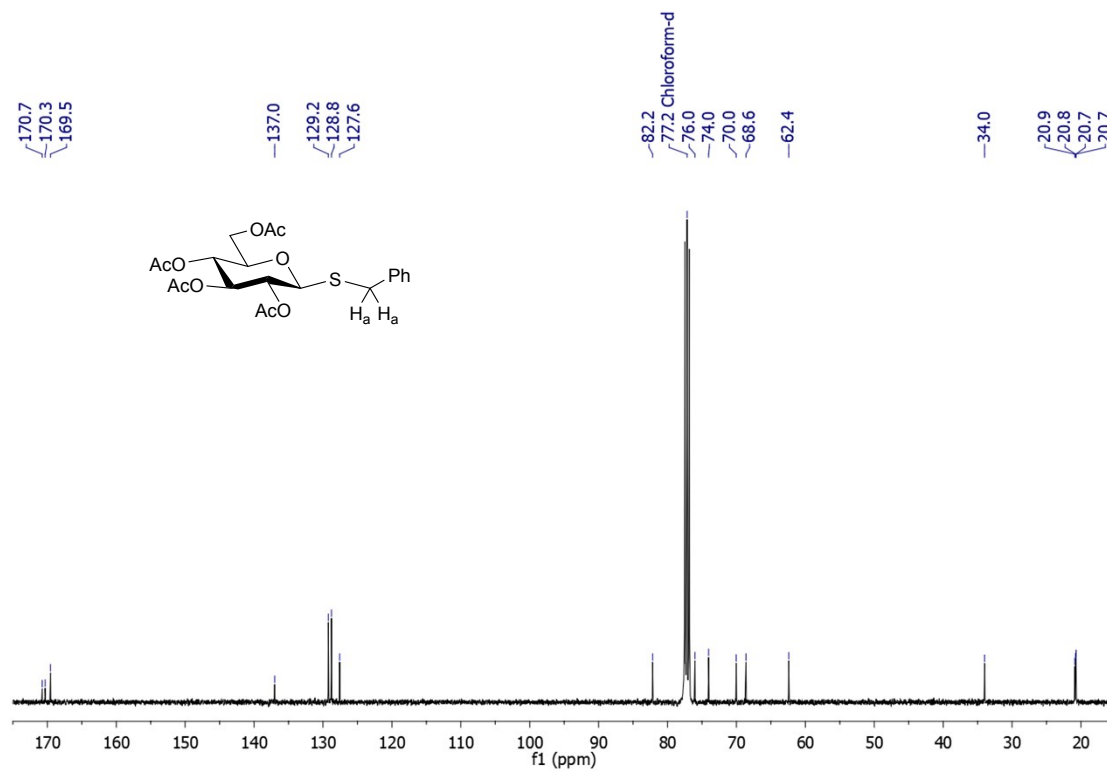

# $^1\text{H}$ NMR of compound **3d**

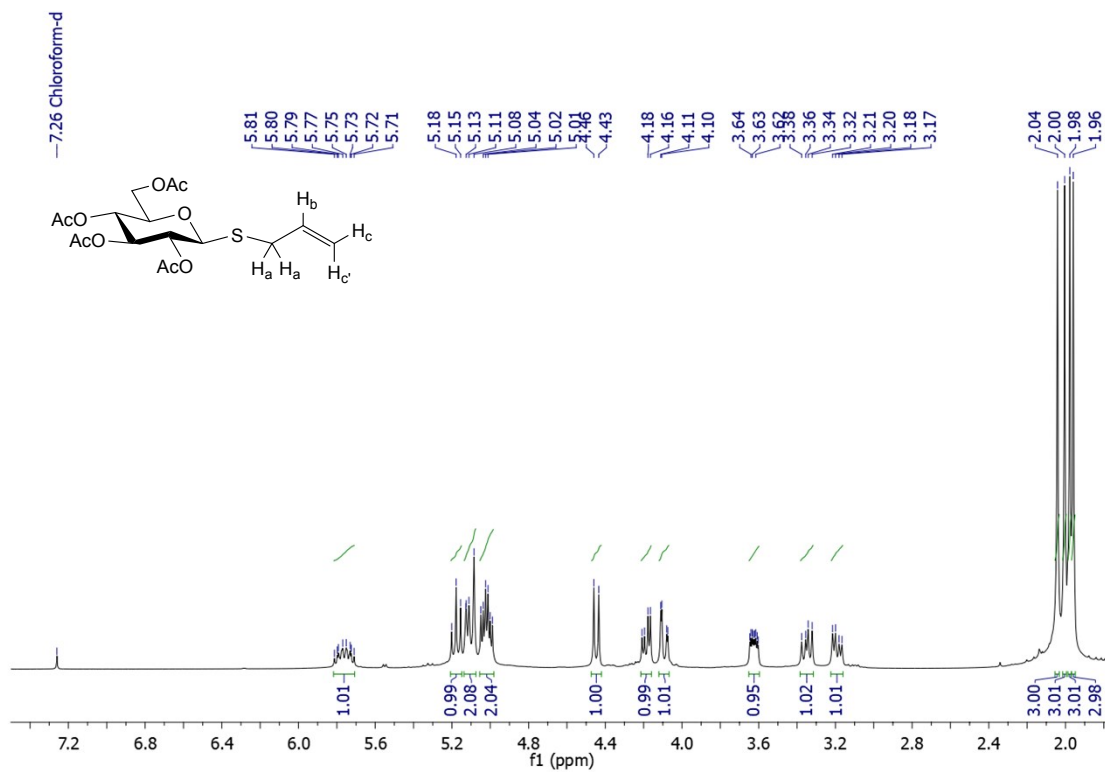

# $^{13}\text{C}$ NMR of compound **3d**

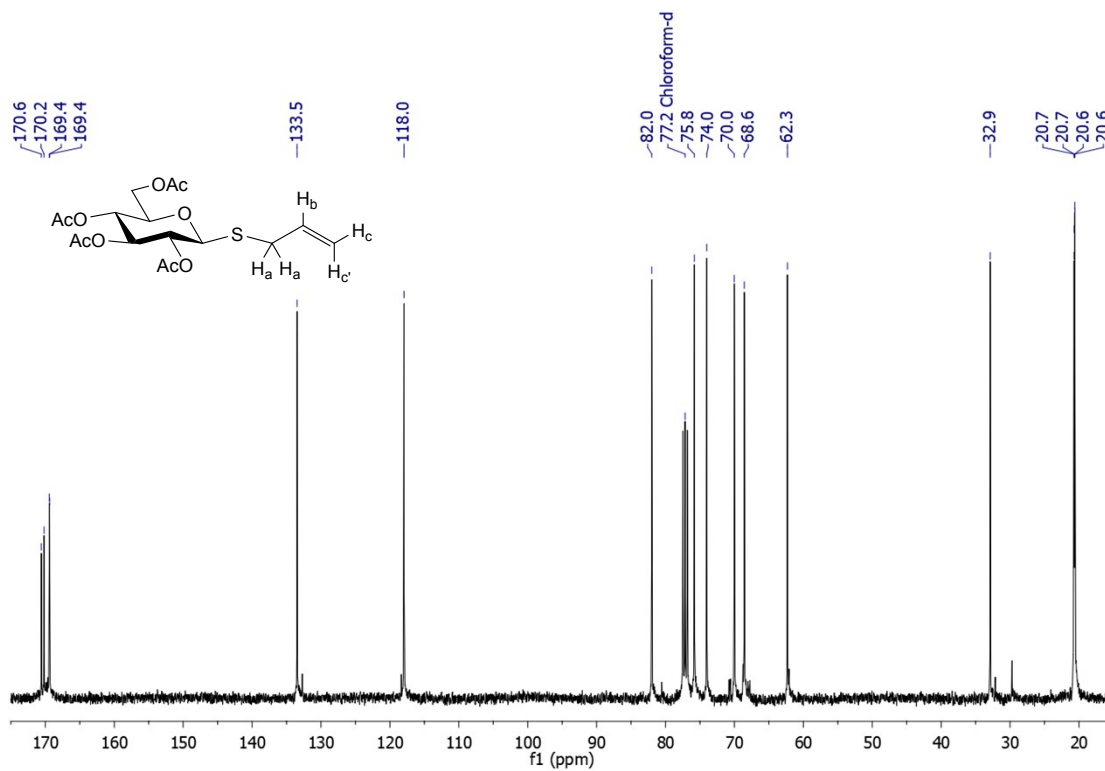

# $^1\text{H}$ NMR of compound **3e**

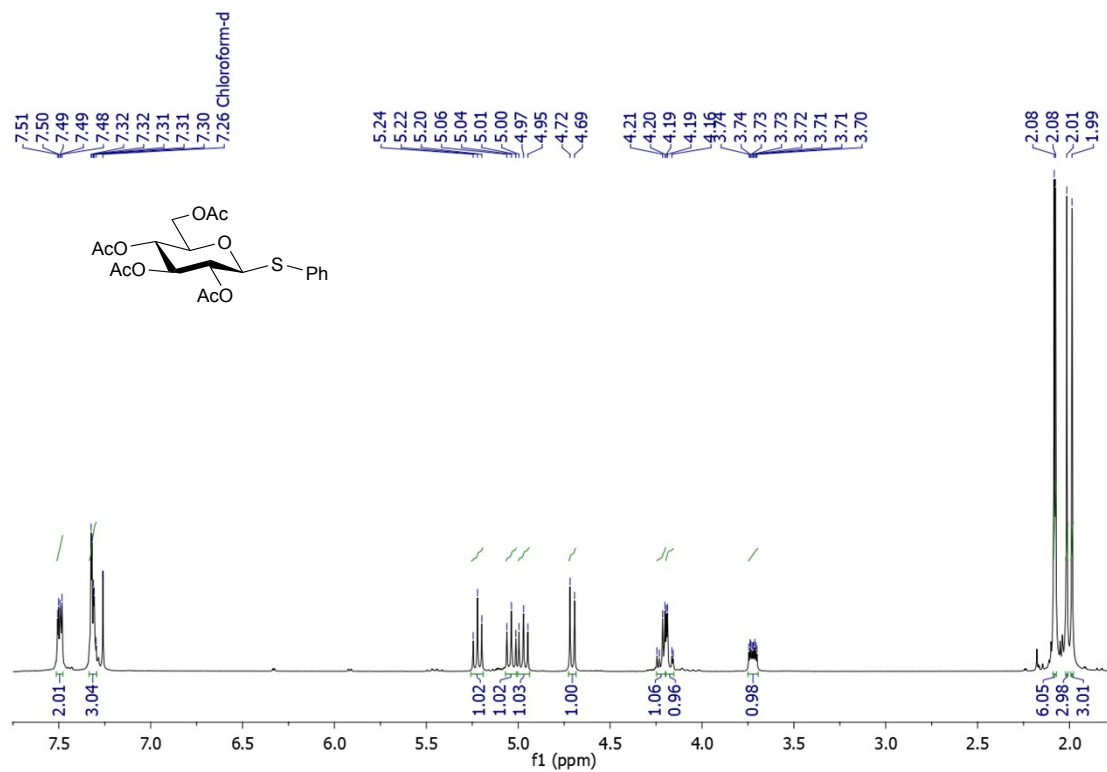

# $^{13}\text{C}$ NMR of compound **3e**

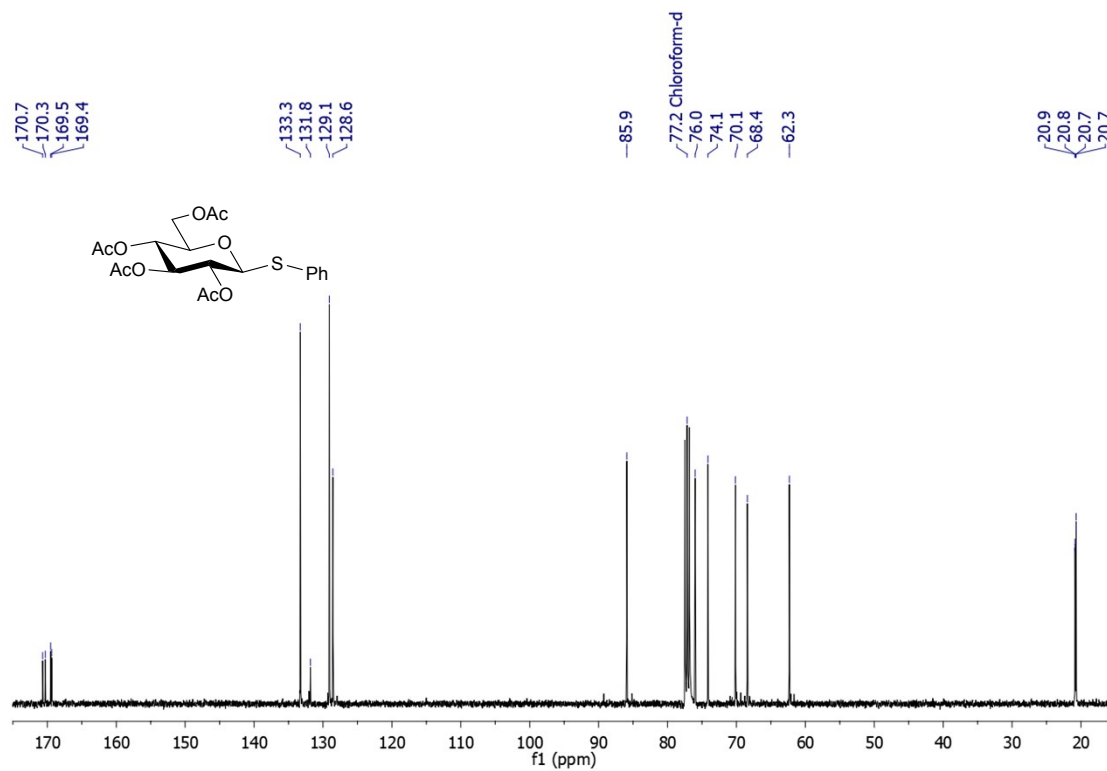

# $^1\text{H}$ NMR of compound **3f**

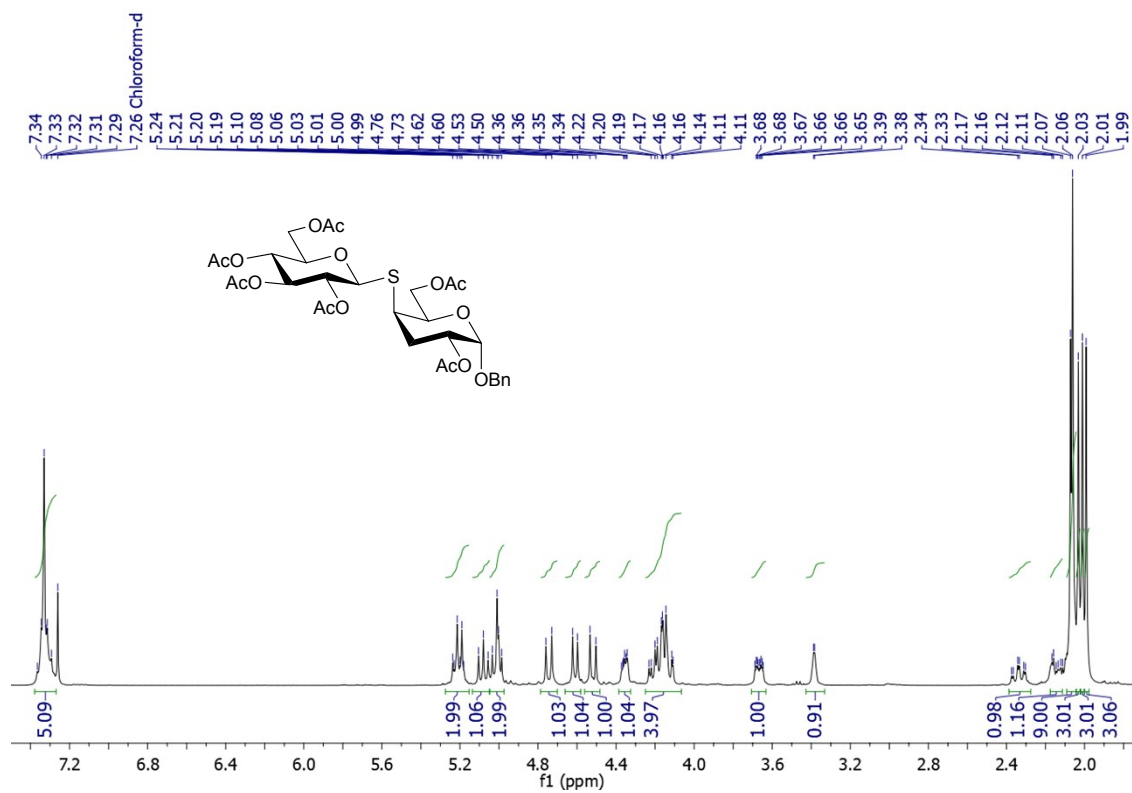

# $^{13}\text{C}$ NMR spectrum of compound **3f**

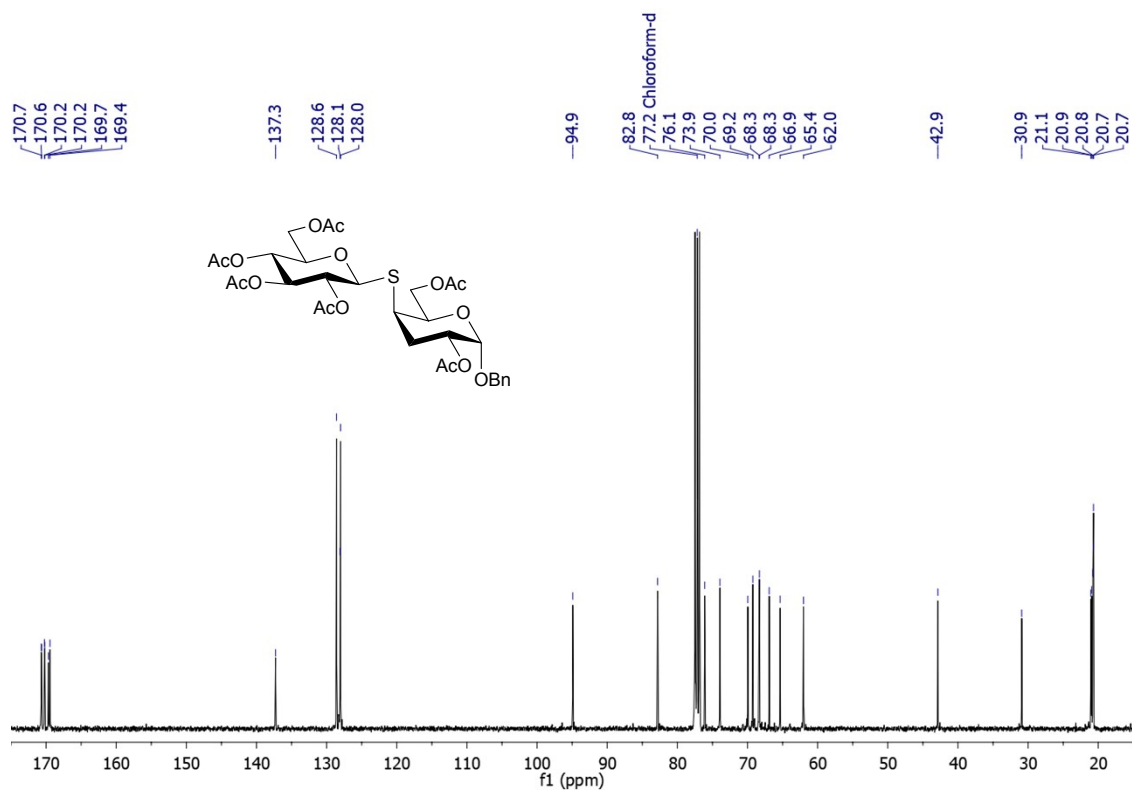

# $^1\text{H}$ NMR of compound **3g**

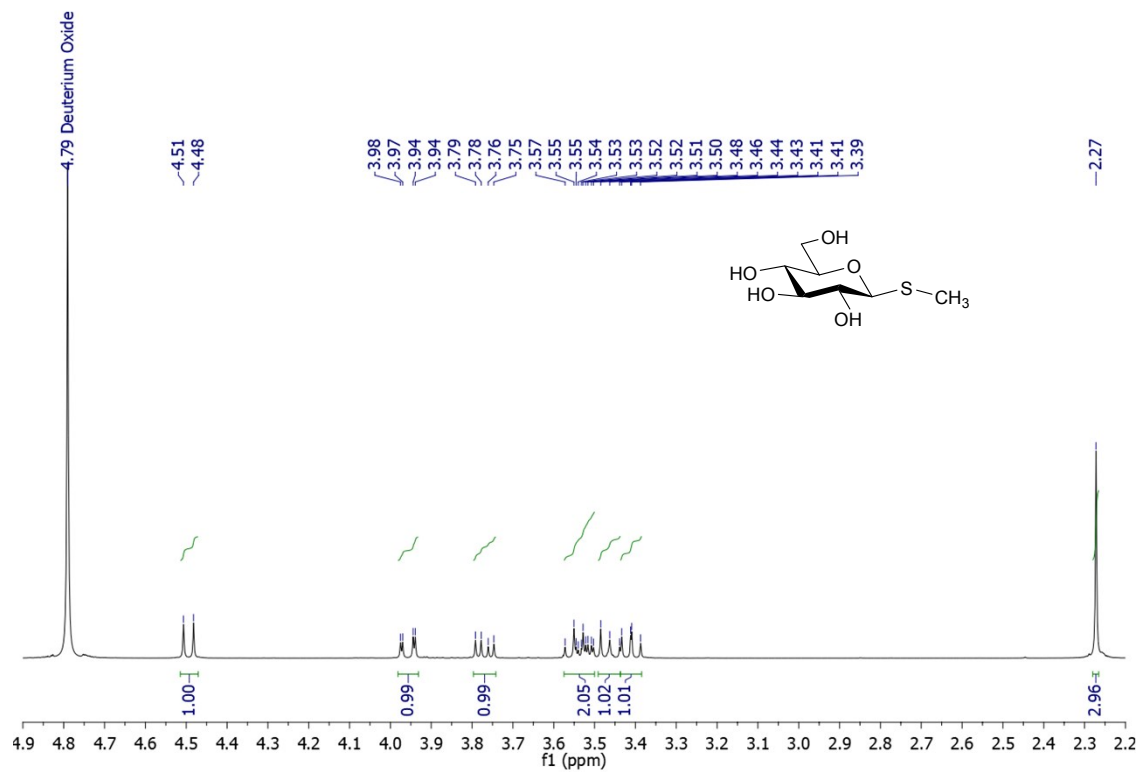

# $^{13}\text{C}$ NMR of compound **3g**

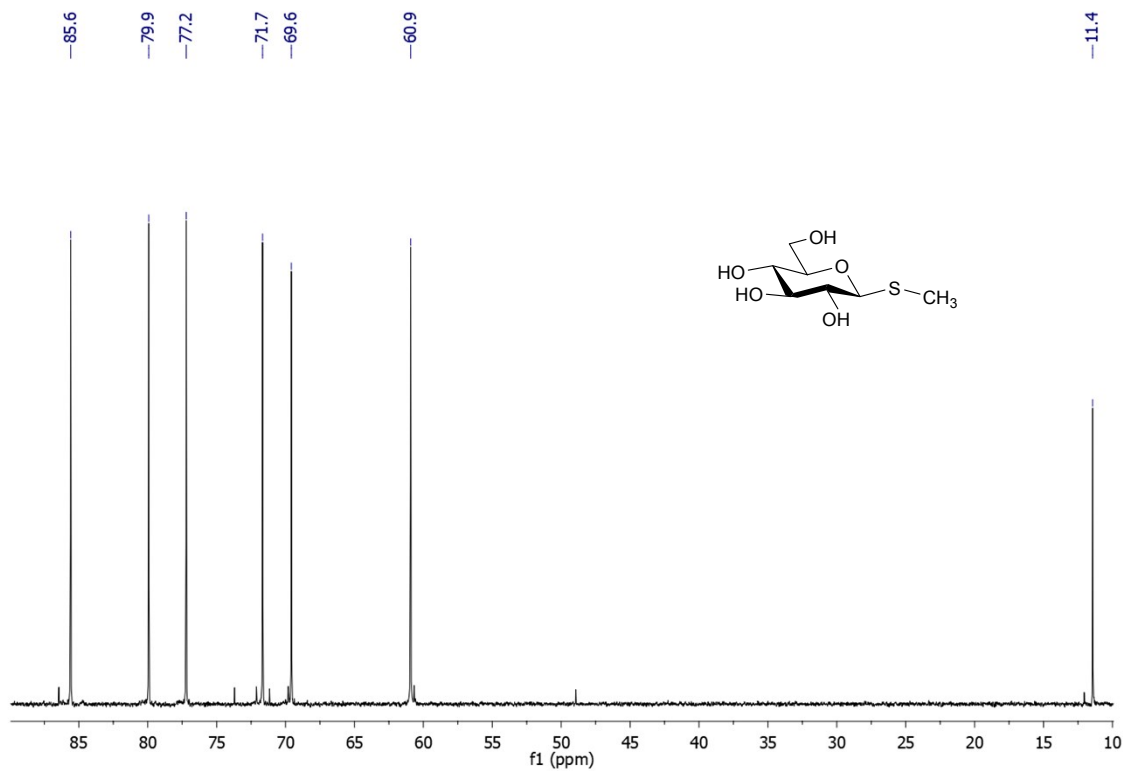



# $^1\text{H}$ NMR of compound **3h**

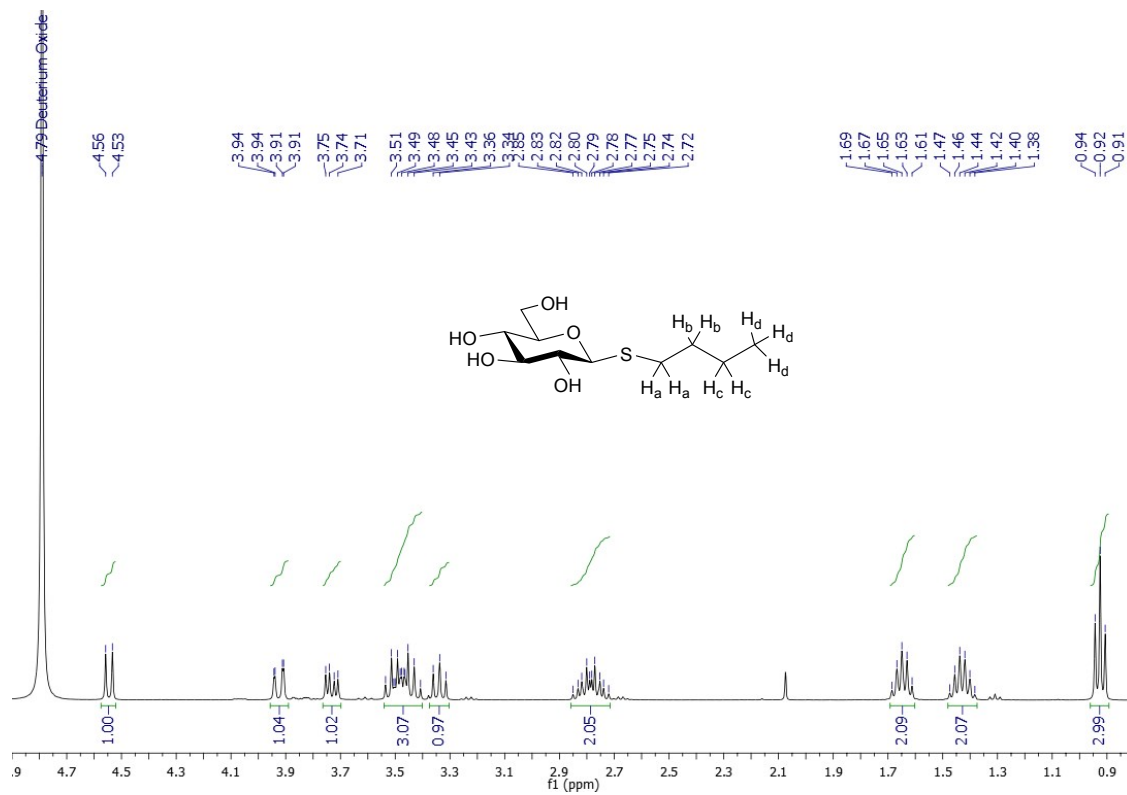

# $^{13}\text{C}$ NMR spectrum of compound **3h**

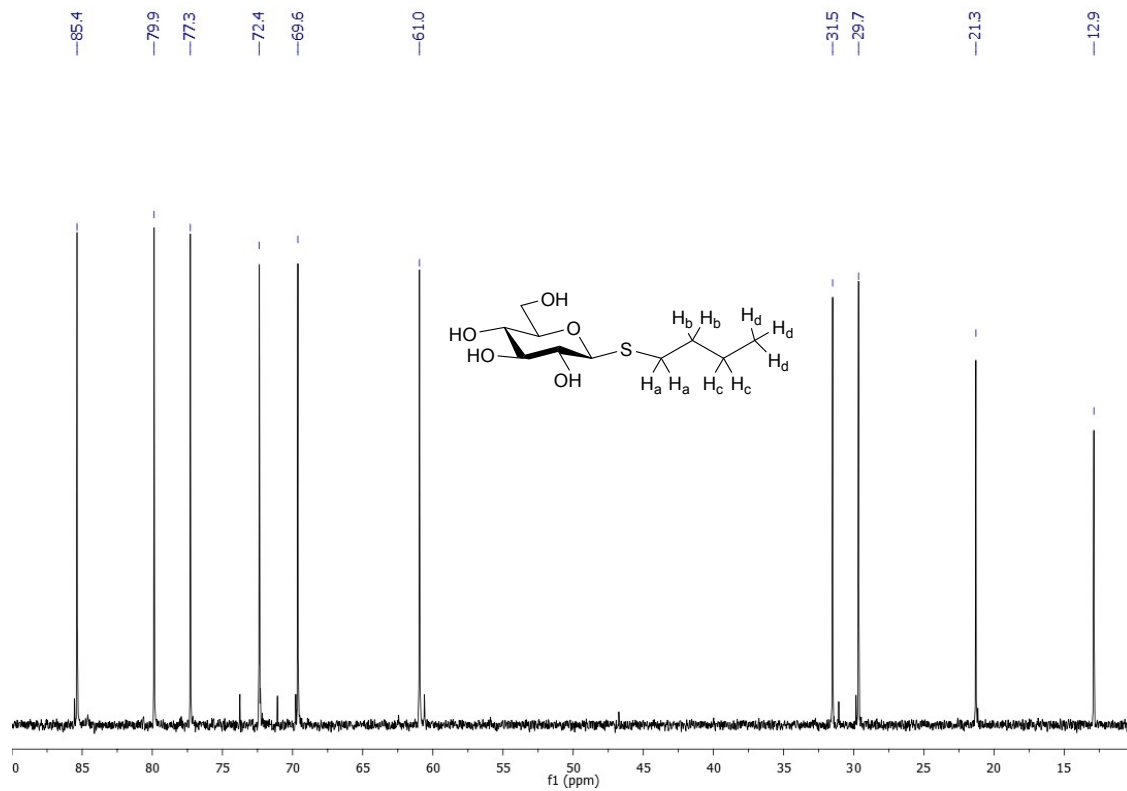

# $^1\text{H}$ NMR of compound **3i**

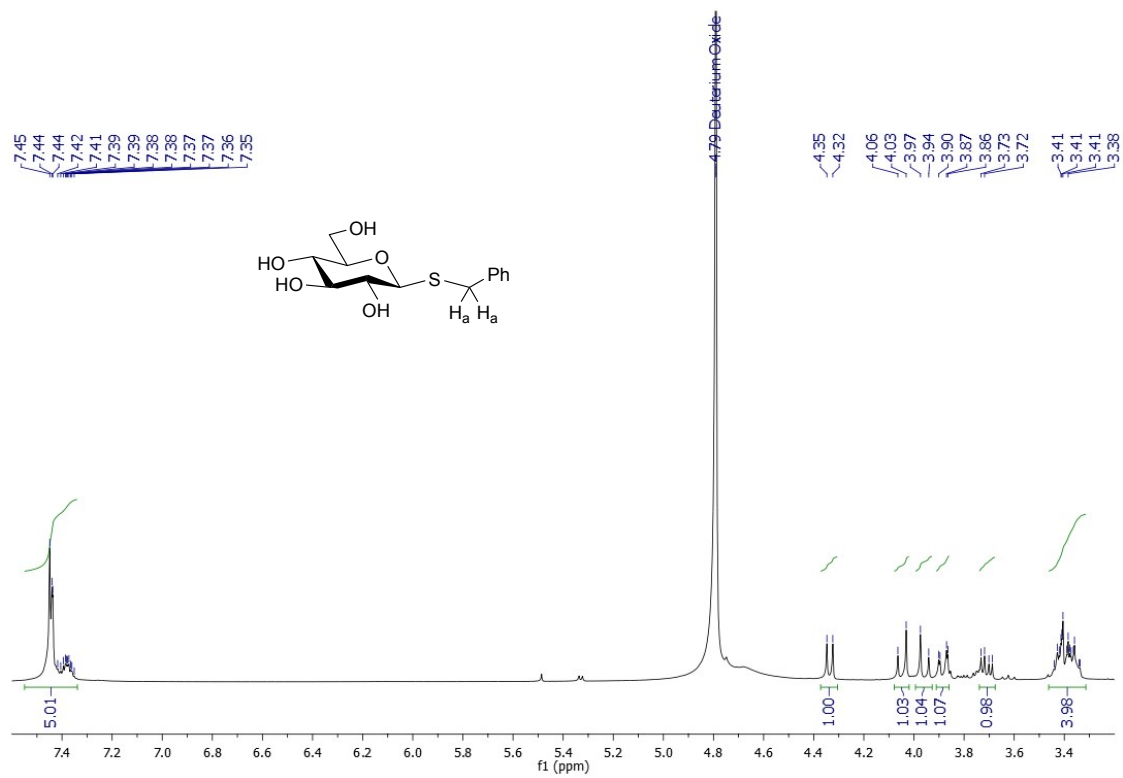

# $^{13}\text{C}$ NMR of compound **3i**

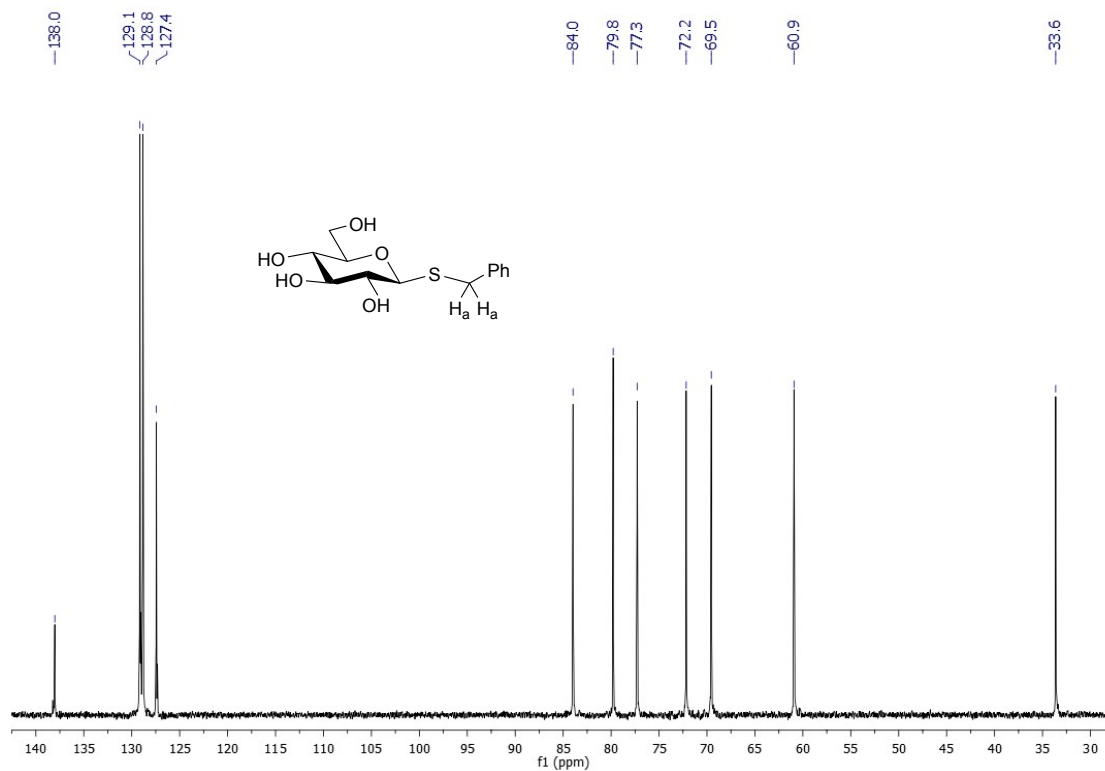

# $^1\text{H}$ NMR of compound **3j**

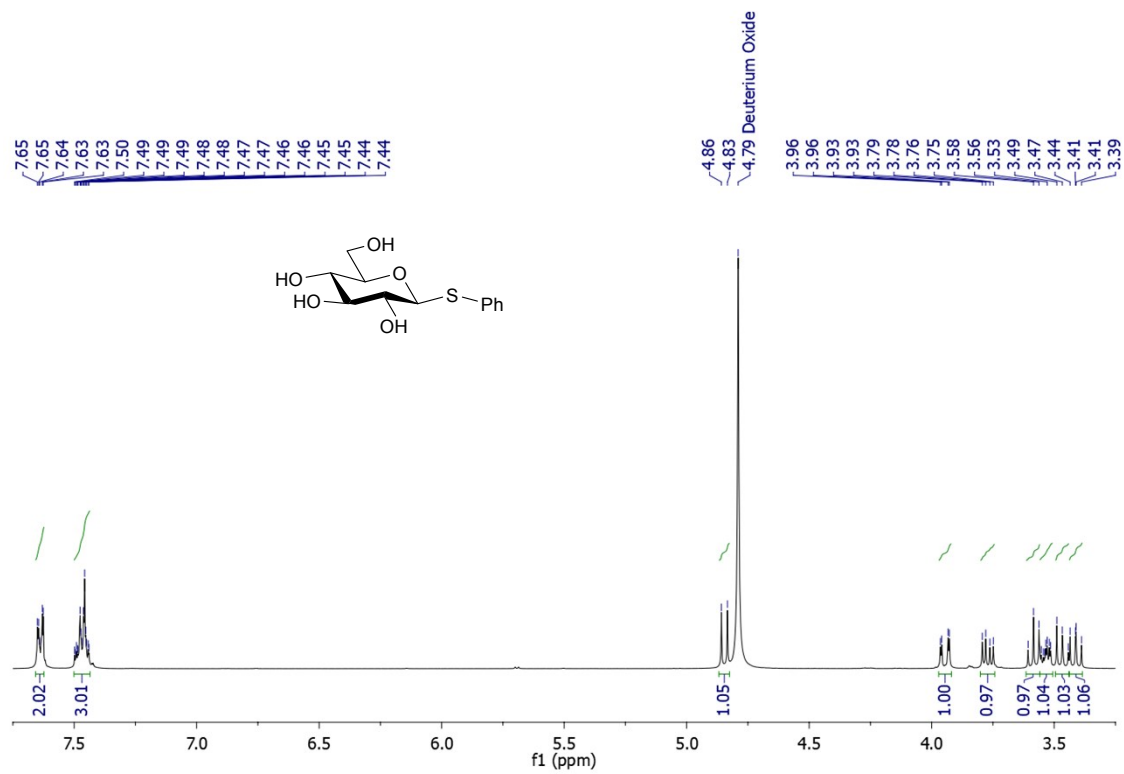

# $^{13}\text{C}$ NMR spectrum of compound **3j**

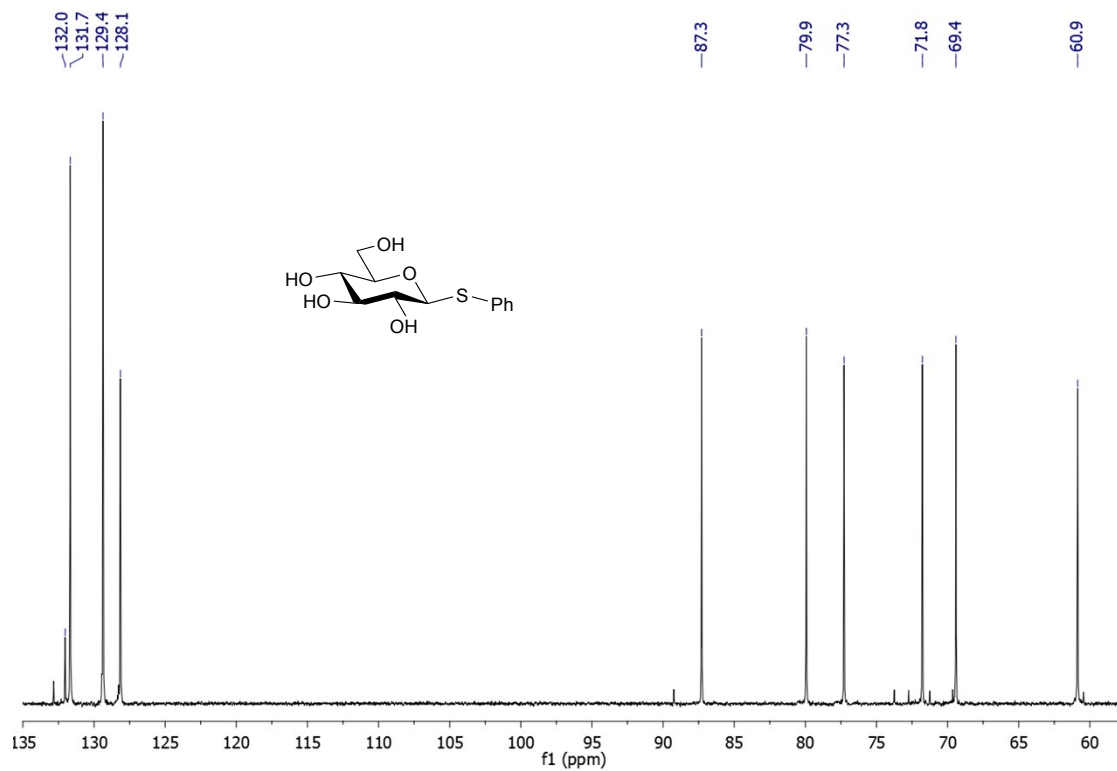

# $^1\text{H}$ NMR of compound **3k**

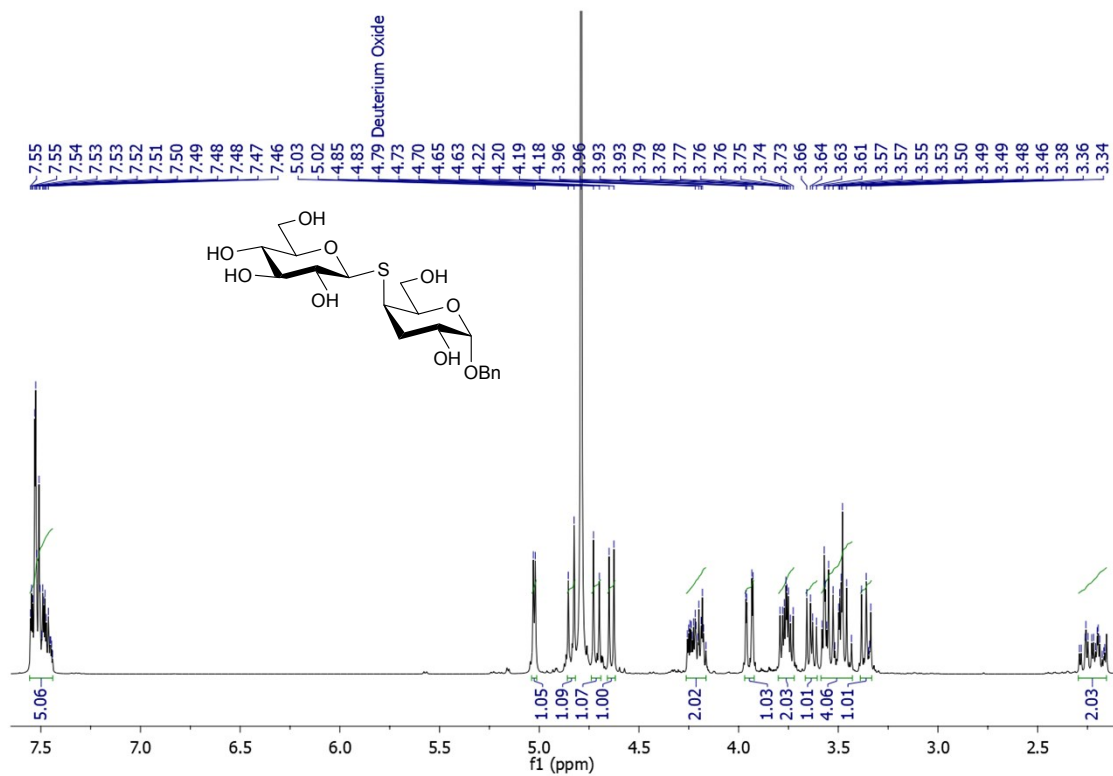

# $^{13}\text{C}$ NMR of compound **3k**

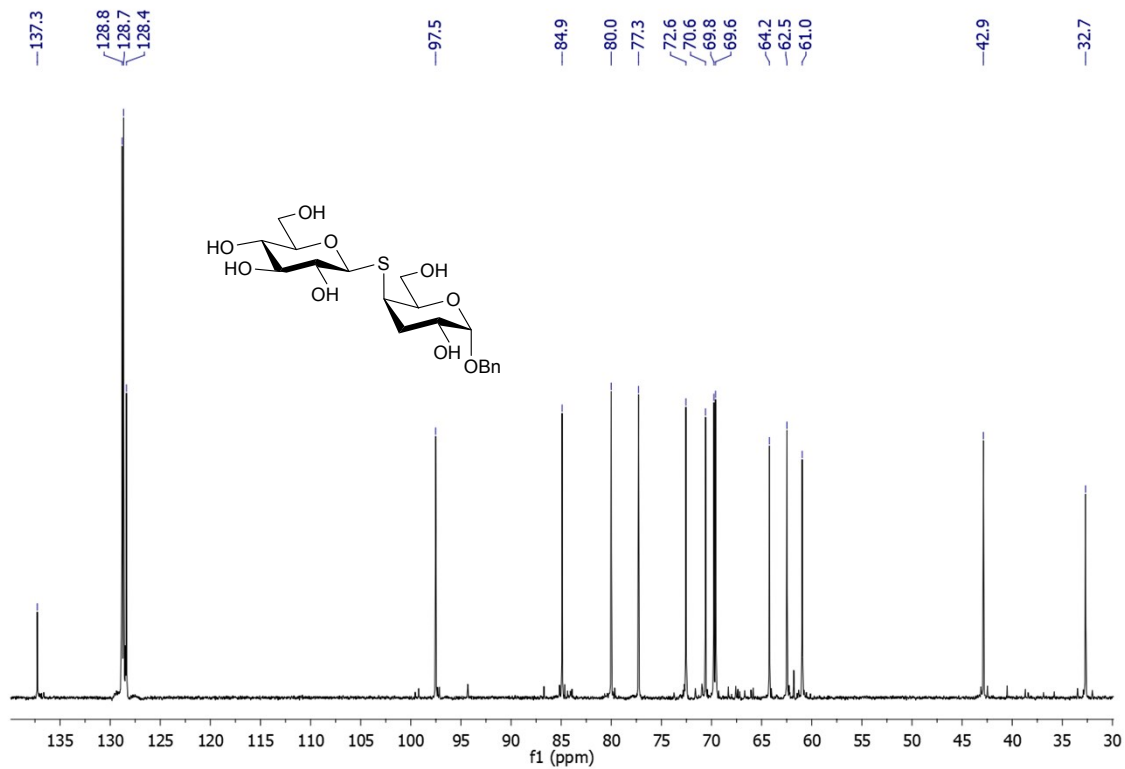

# $^1\text{H}$ NMR of compound **4aR**

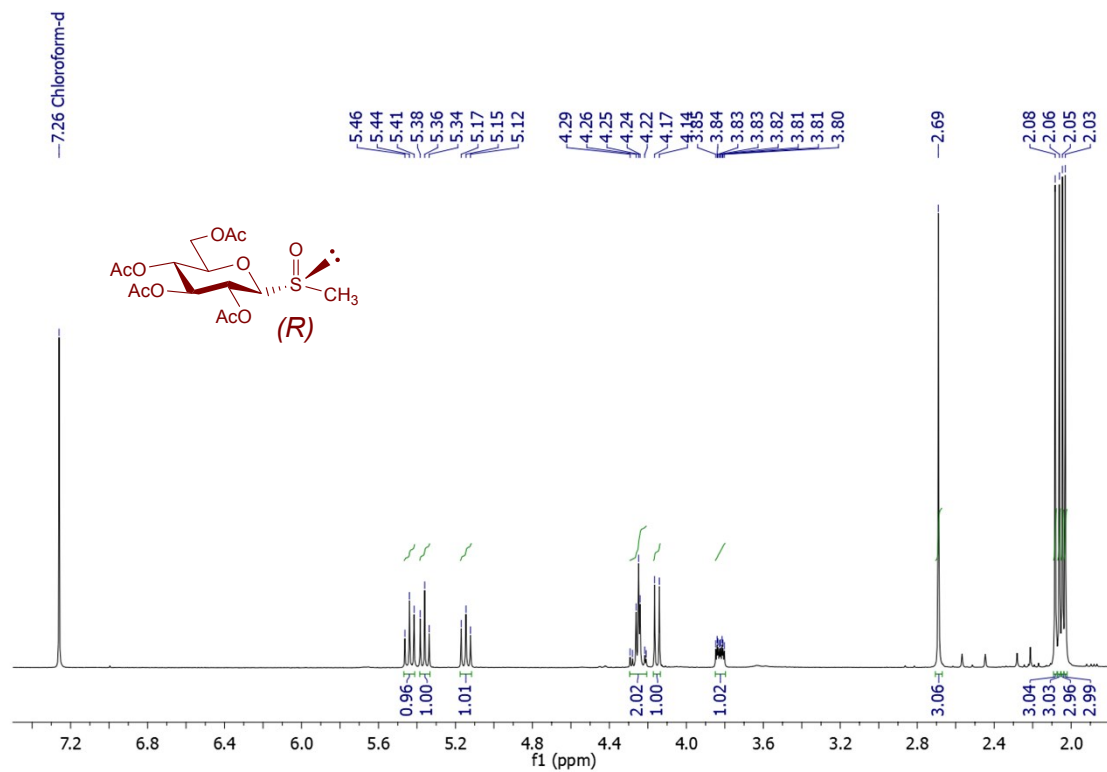

# $^{13}\text{C}$ NMR of compound **4aR**

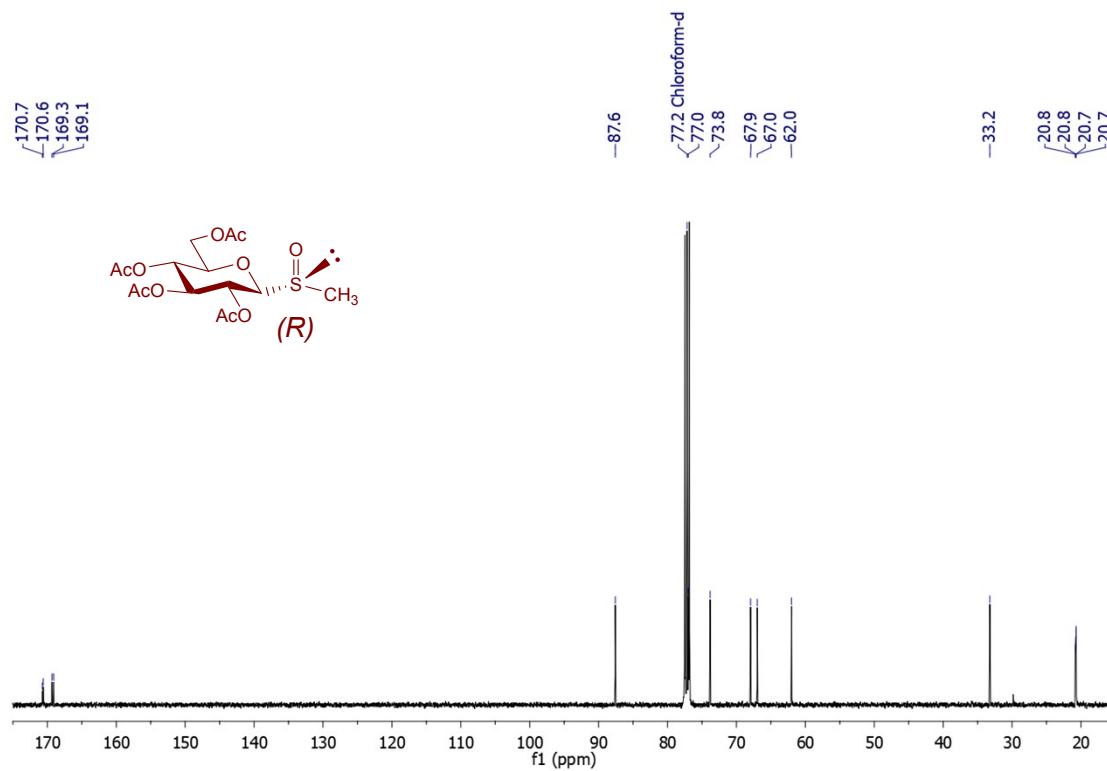

NOESY of compound **4aR**

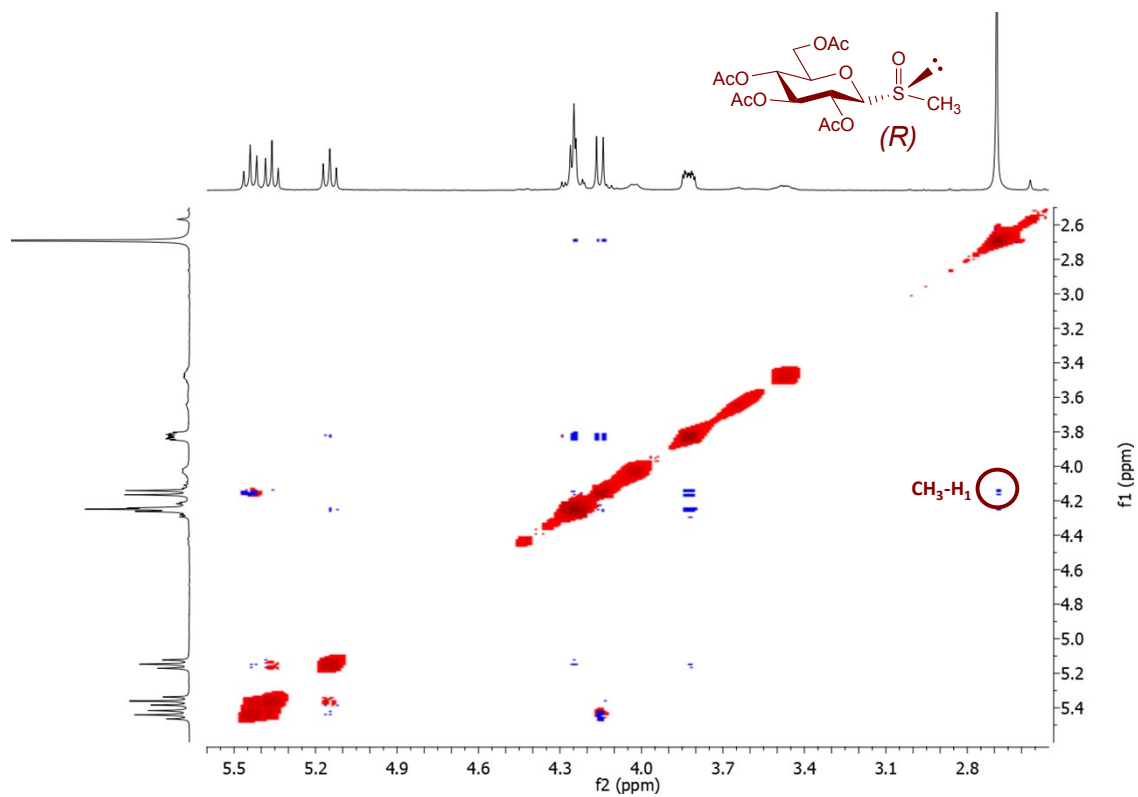

<sup>1</sup>H NMR of compound **4aS**

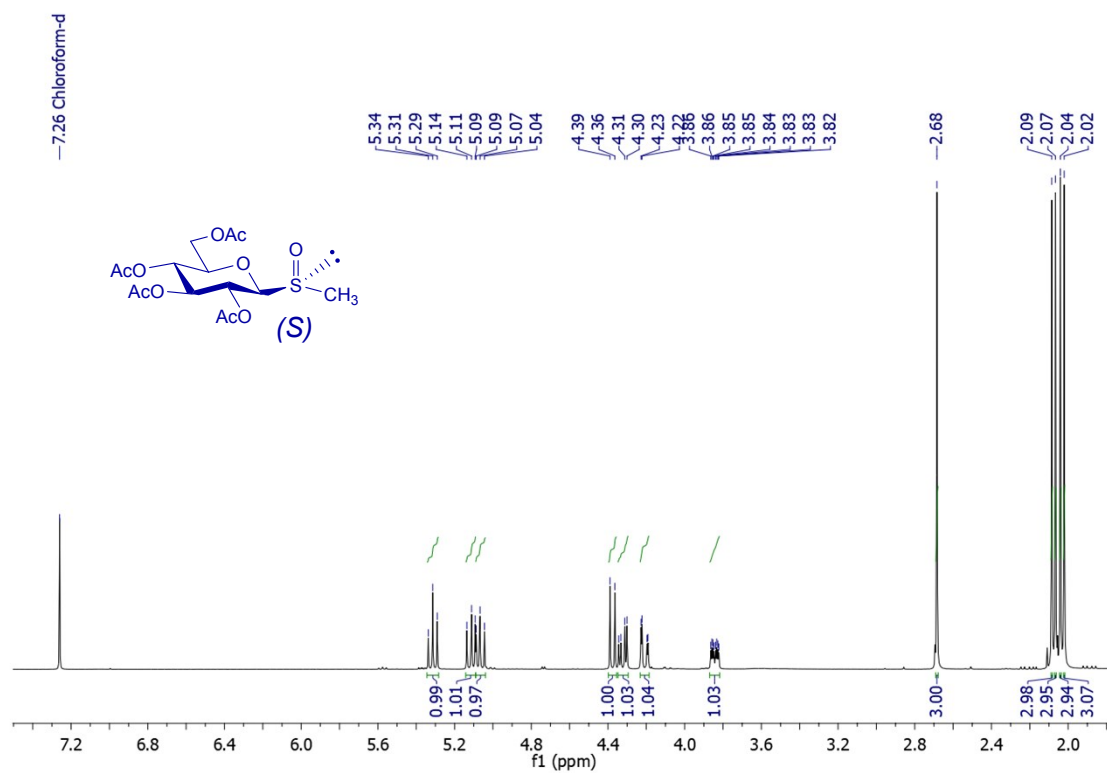

### $^{13}\text{C}$ NMR of compound **4aS**

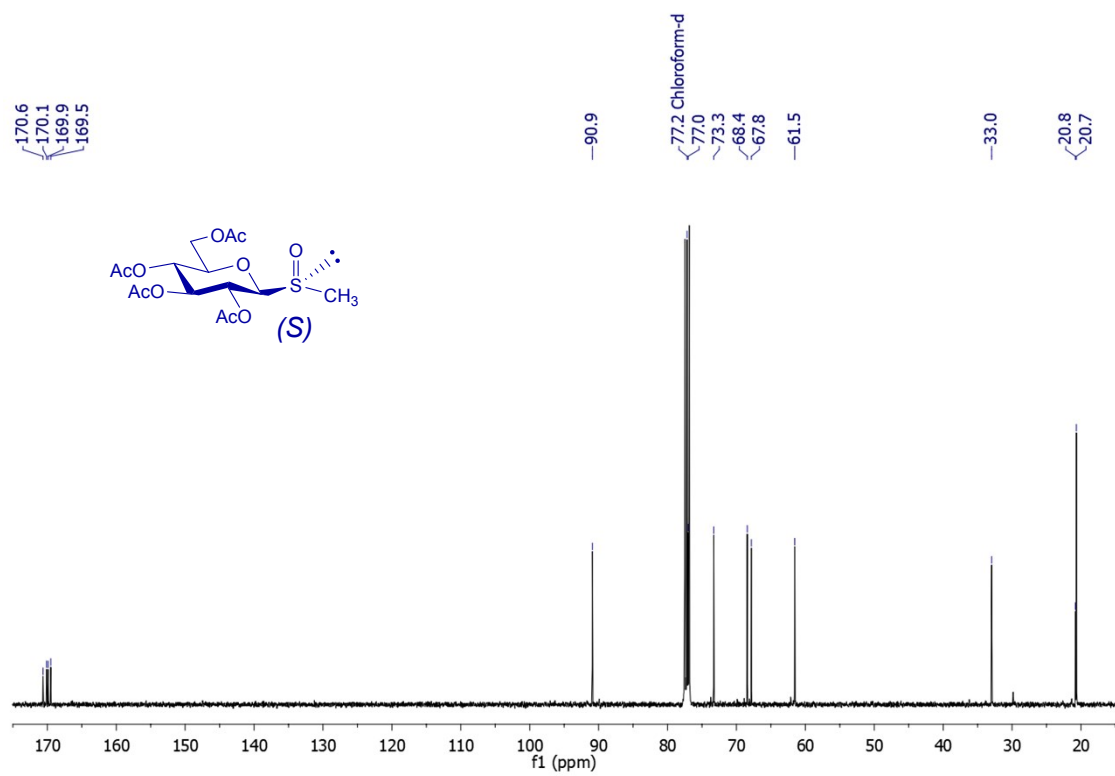

### NOESY of compound **4aS**

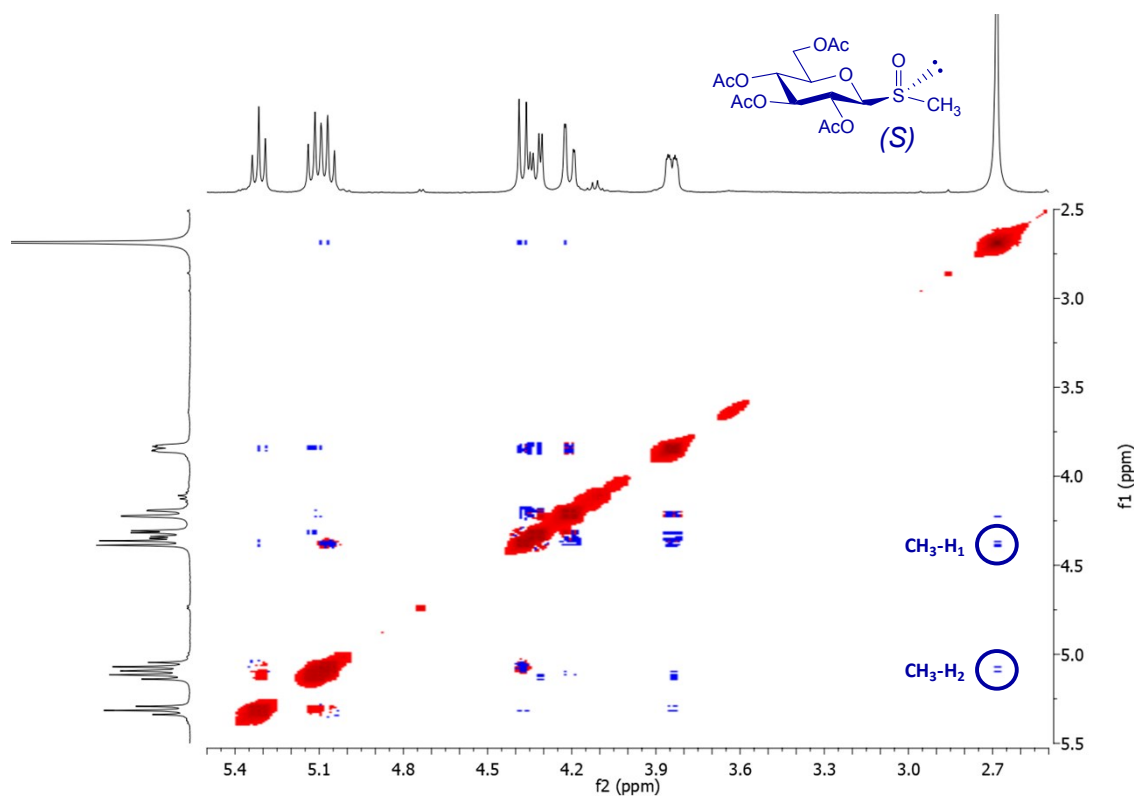

$^1\text{H}$  NMR of compounds **4bR** and **4bS**

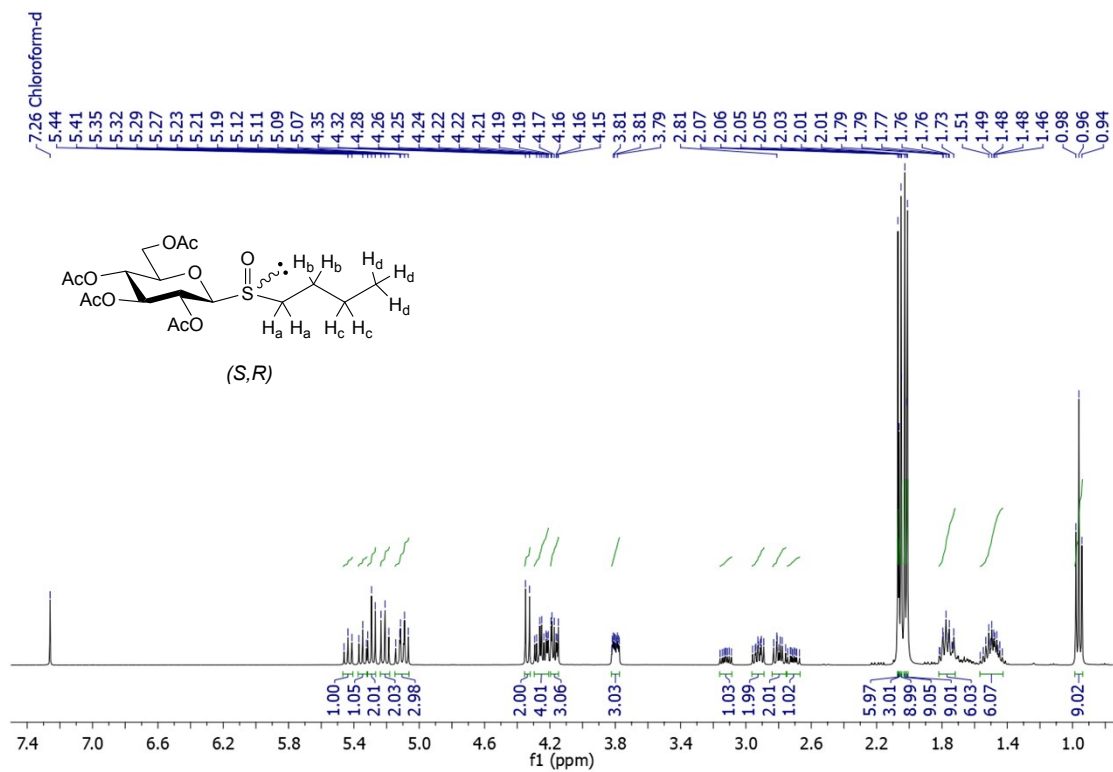

$^{13}\text{C}$  NMR of compounds **4bR** and **4bS**

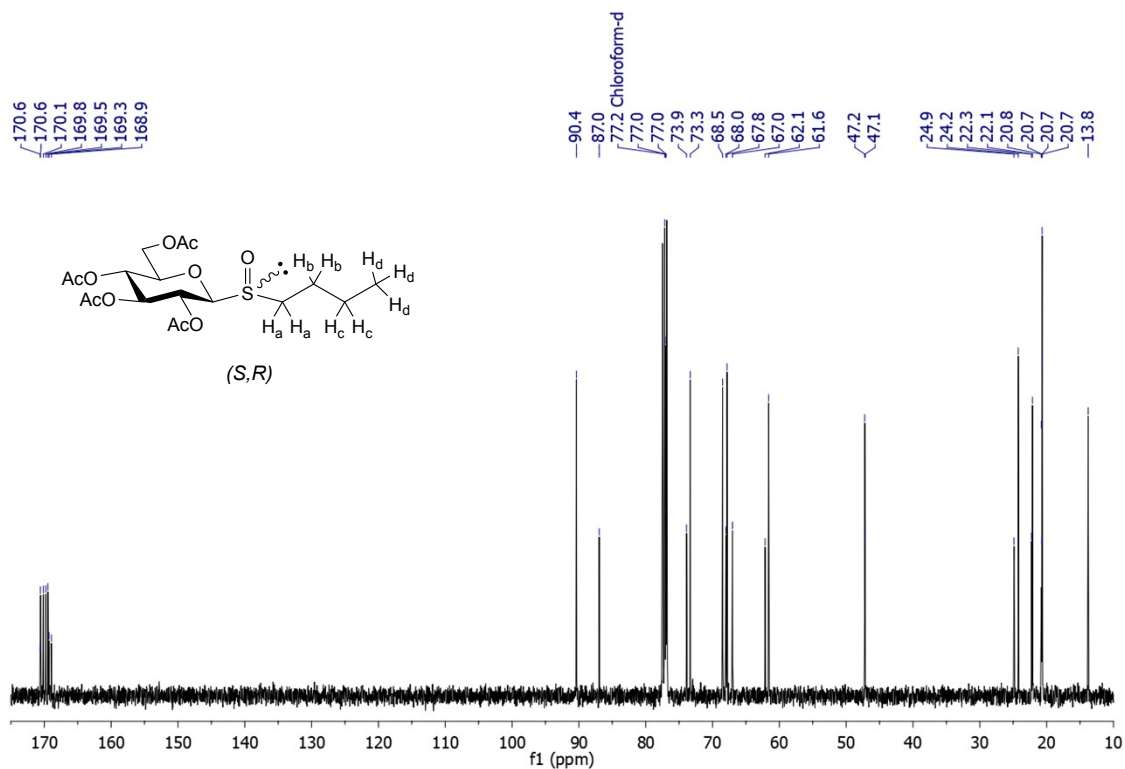



## NOESY of compounds **4bR** and **4bS**

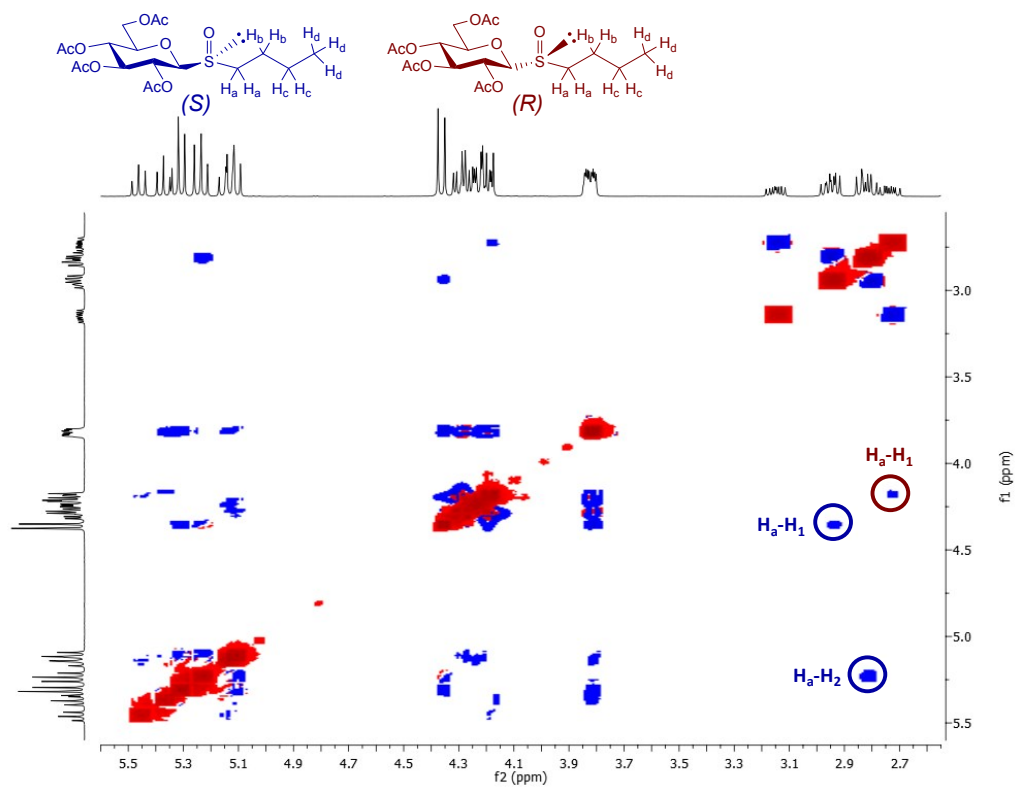

## $^1\text{H}$ NMR of compounds **4cR** and **4cS**

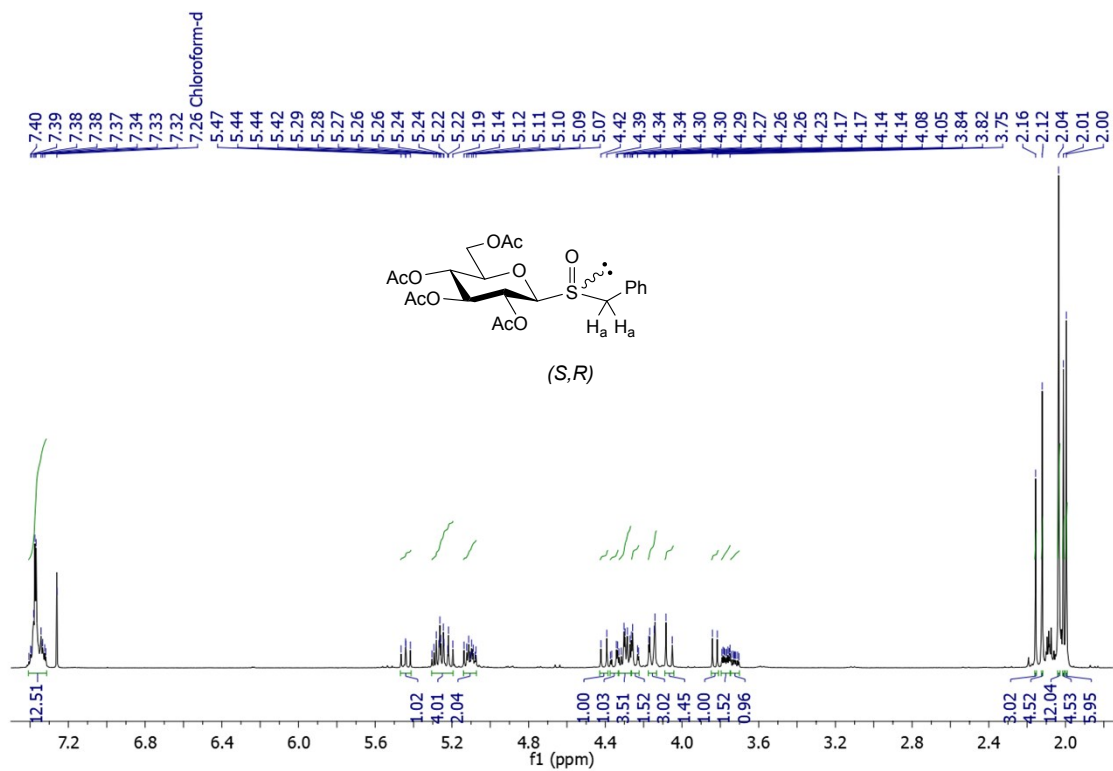

### $^{13}\text{C}$ NMR of compounds **4cR** and **4cS**

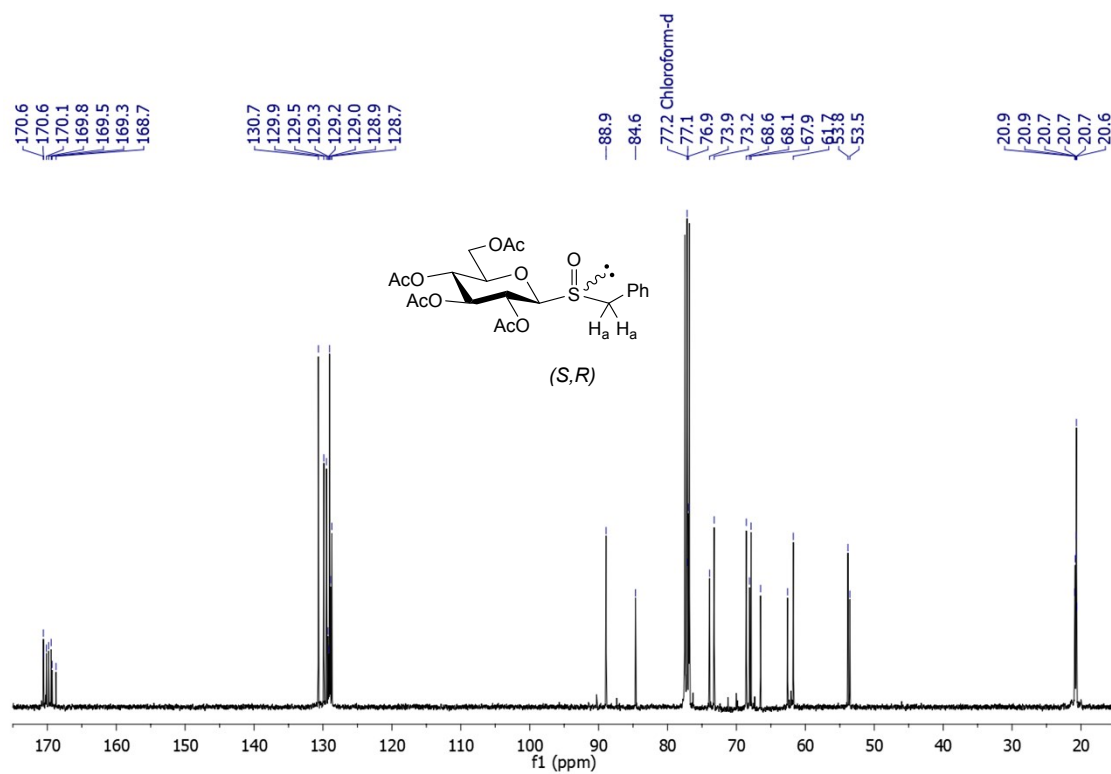

### NOESY of compounds **4cR** and **4cS**

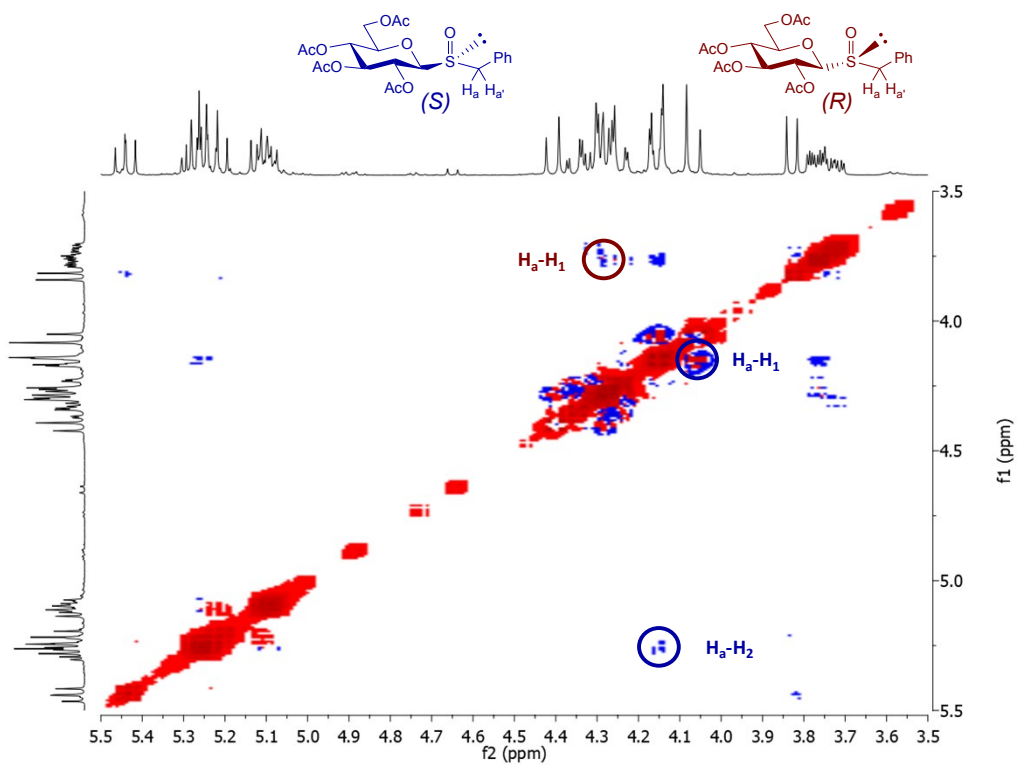

$^1\text{H}$  NMR of compounds **4dR** and **4dS**

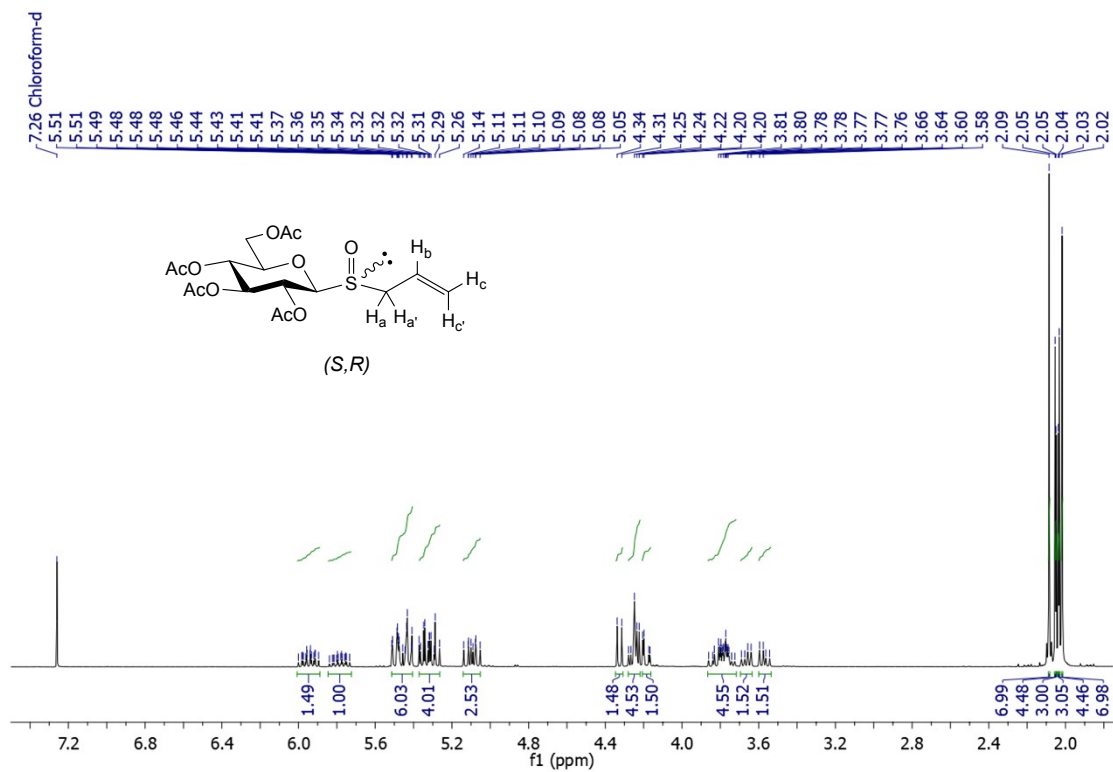

$^{13}\text{C}$  NMR of compounds **4dR** and **4dS**

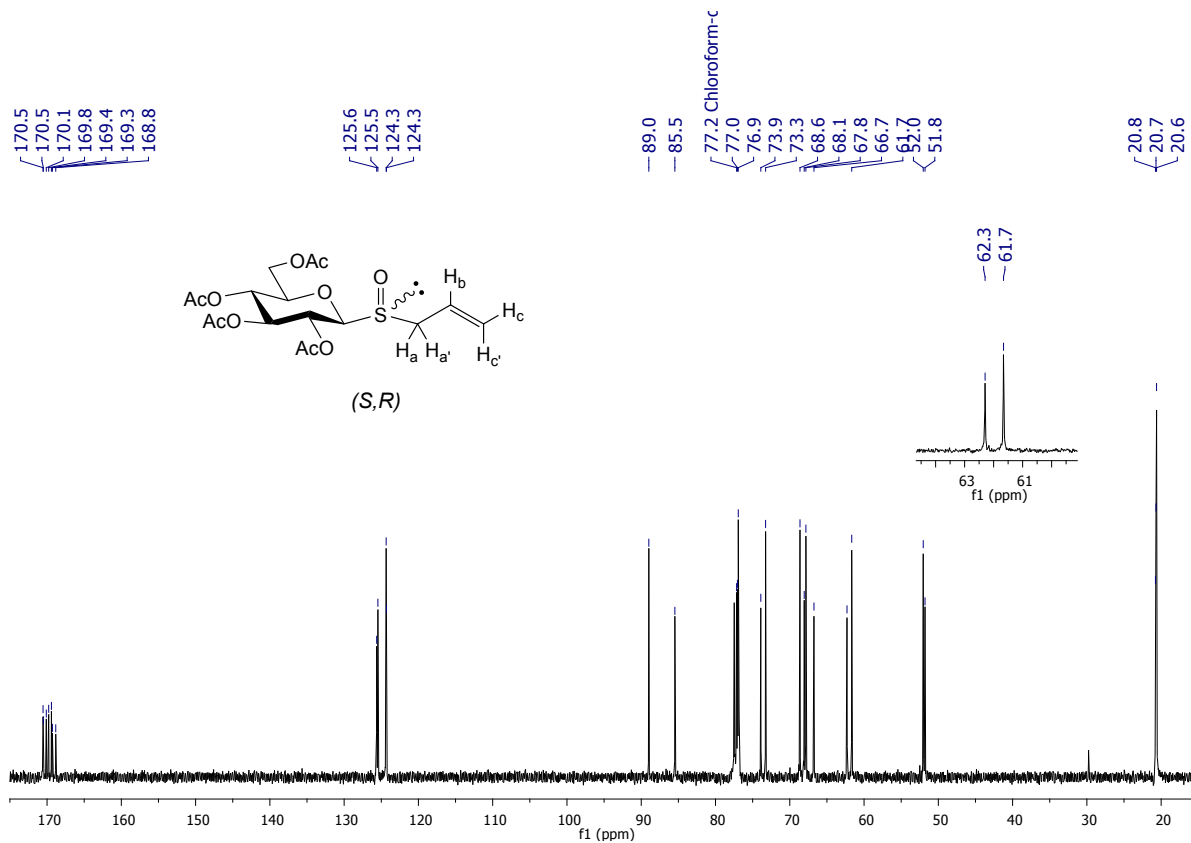

## NOESY of compounds **4dR** and **4dS**

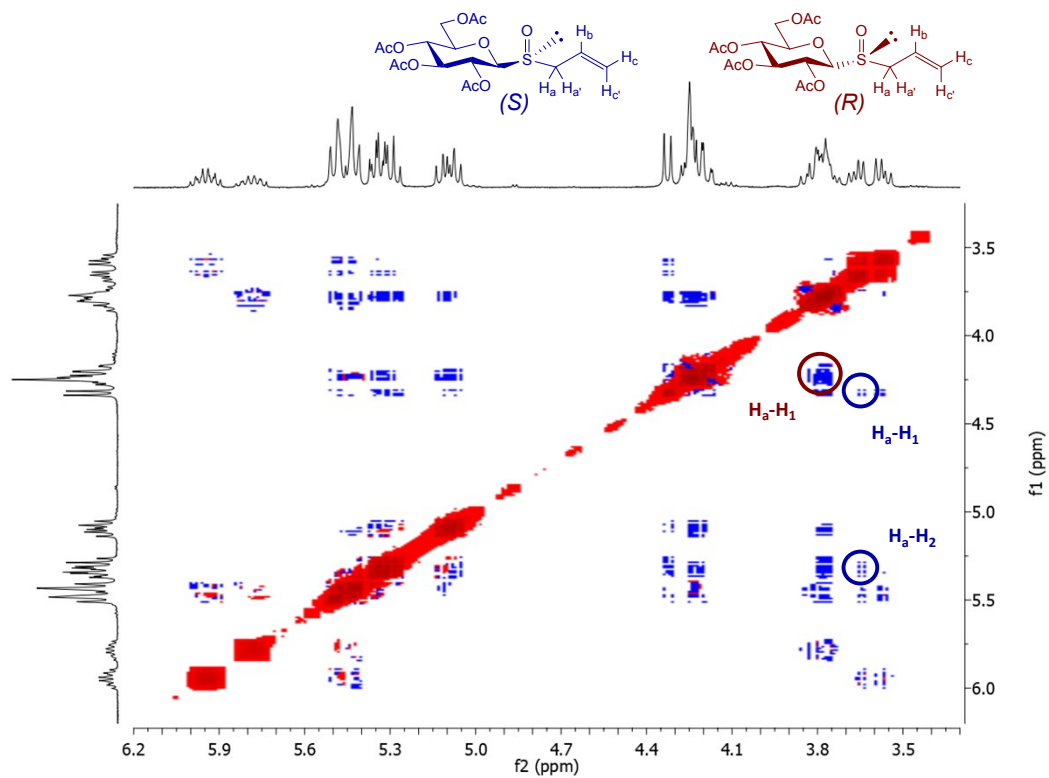

## $^1\text{H}$ NMR of compounds **4gR** and **4gS**

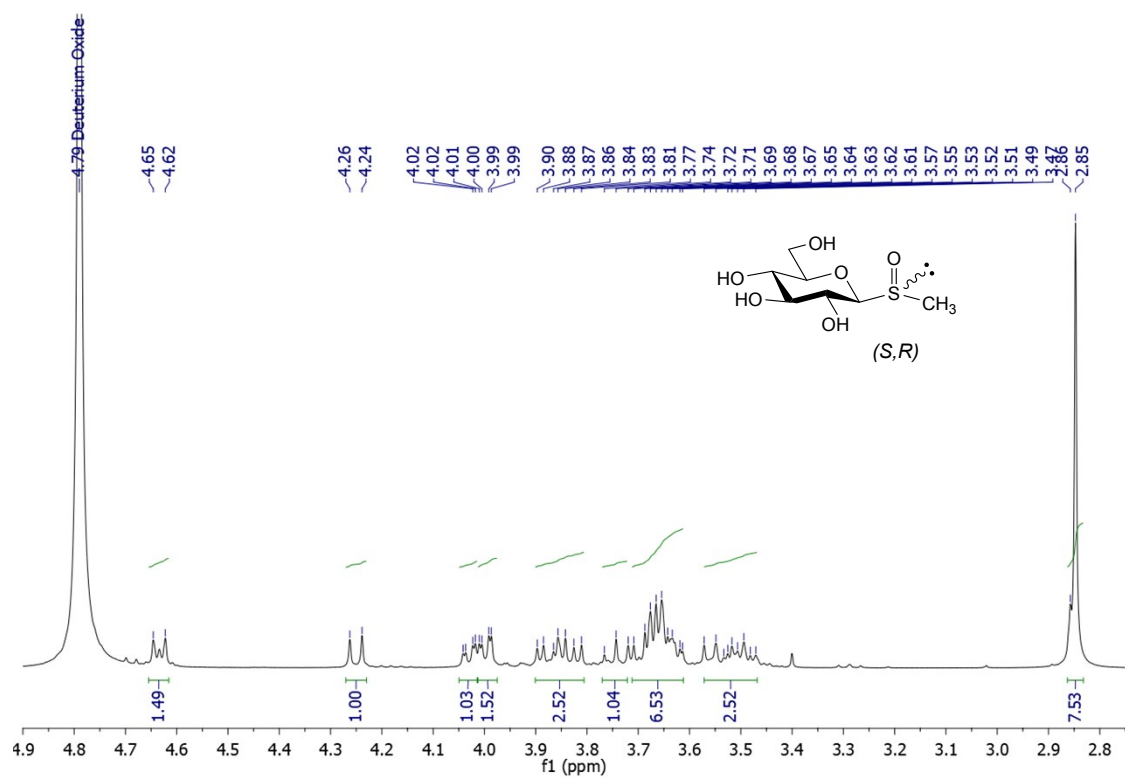

### $^{13}\text{C}$ NMR of compounds **4gR** and **4gS**

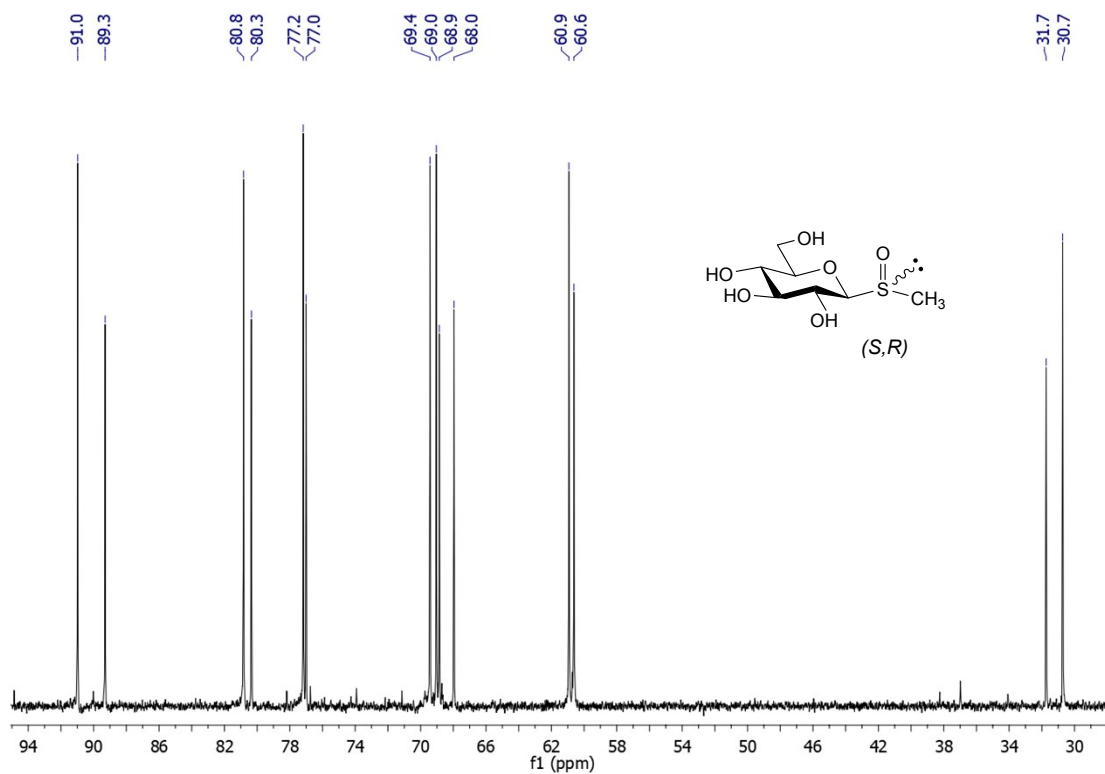

### NOESY of compounds **4gR** and **4gS**

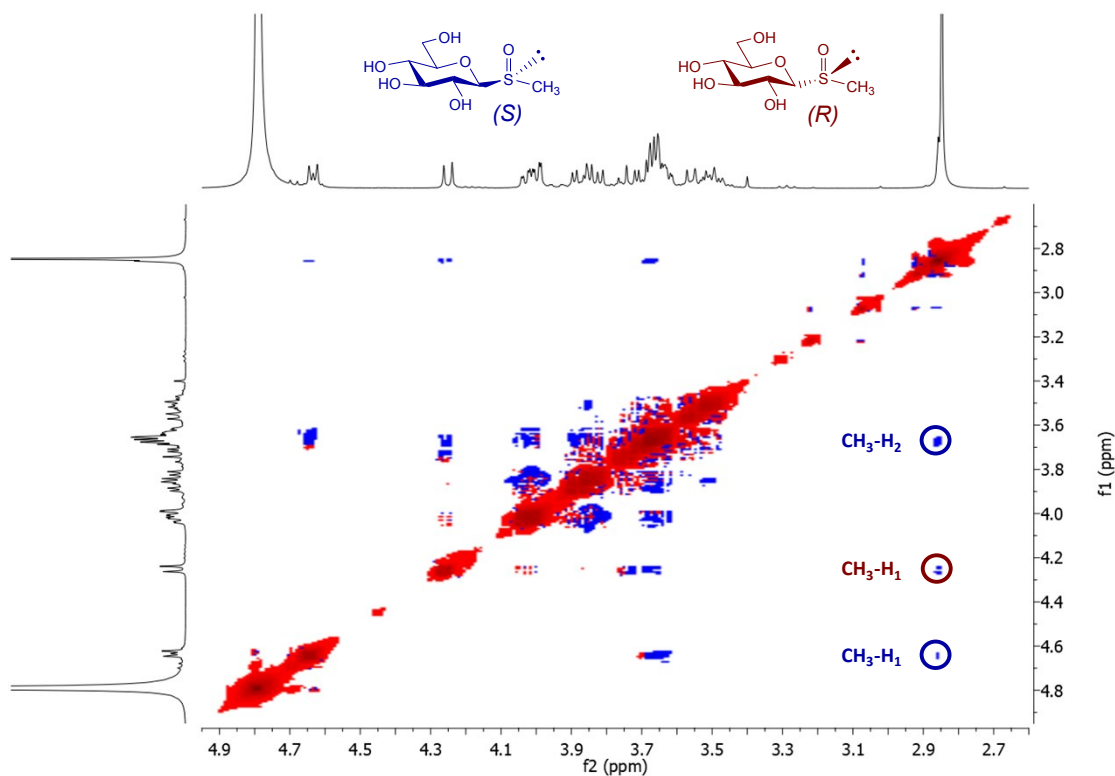

# $^1\text{H}$ NMR of compounds **4hR** and **4hS**

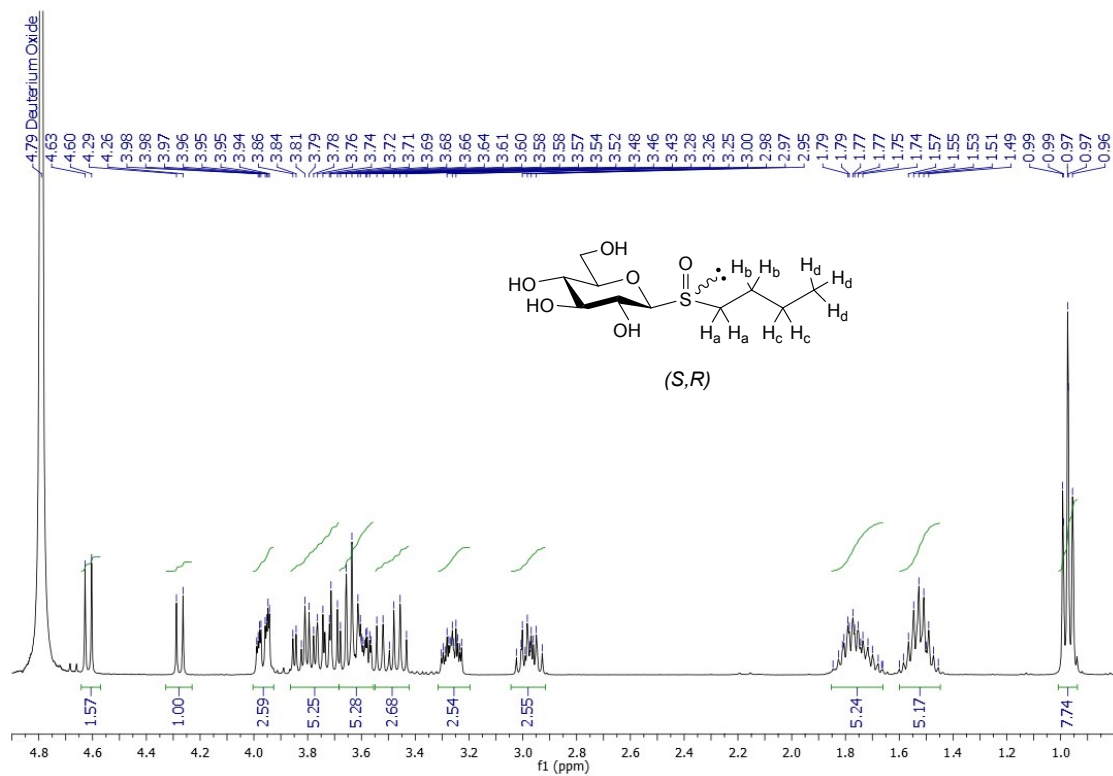

# $^{13}\text{C}$ NMR of compounds **4hR** and **4hS**

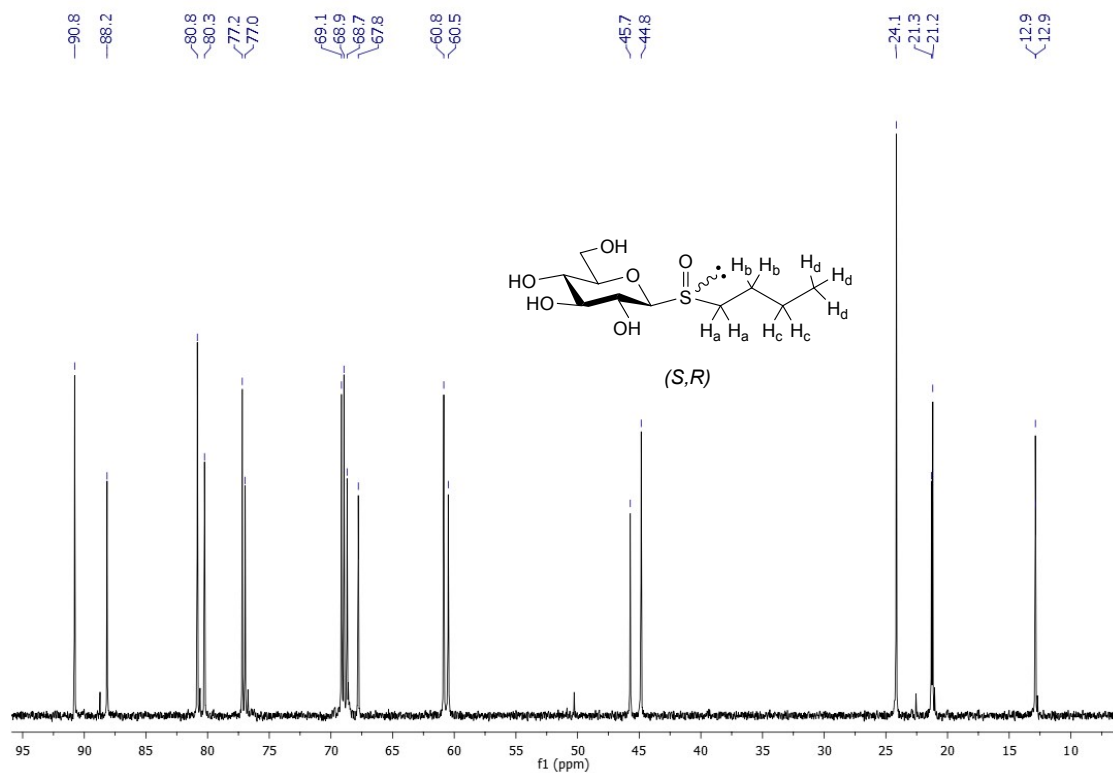

## NOESY of compounds **4hR** and **4hS**

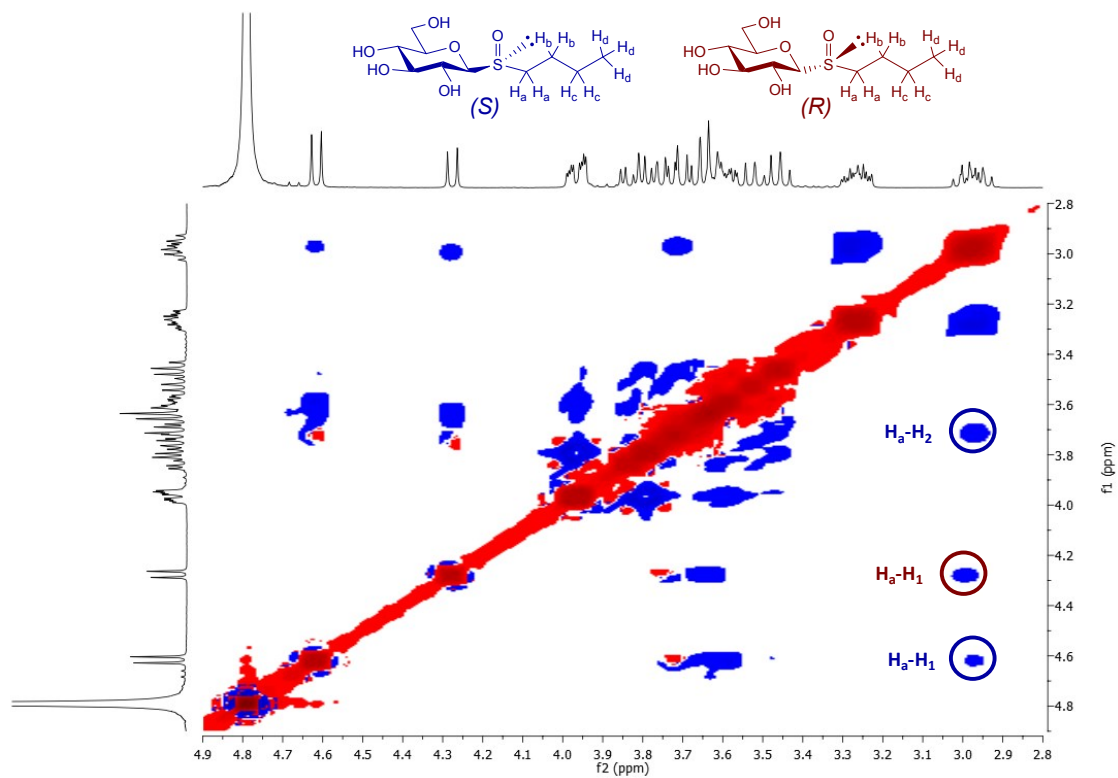

## $^1\text{H}$ NMR of compounds **4iR** and **4iS**

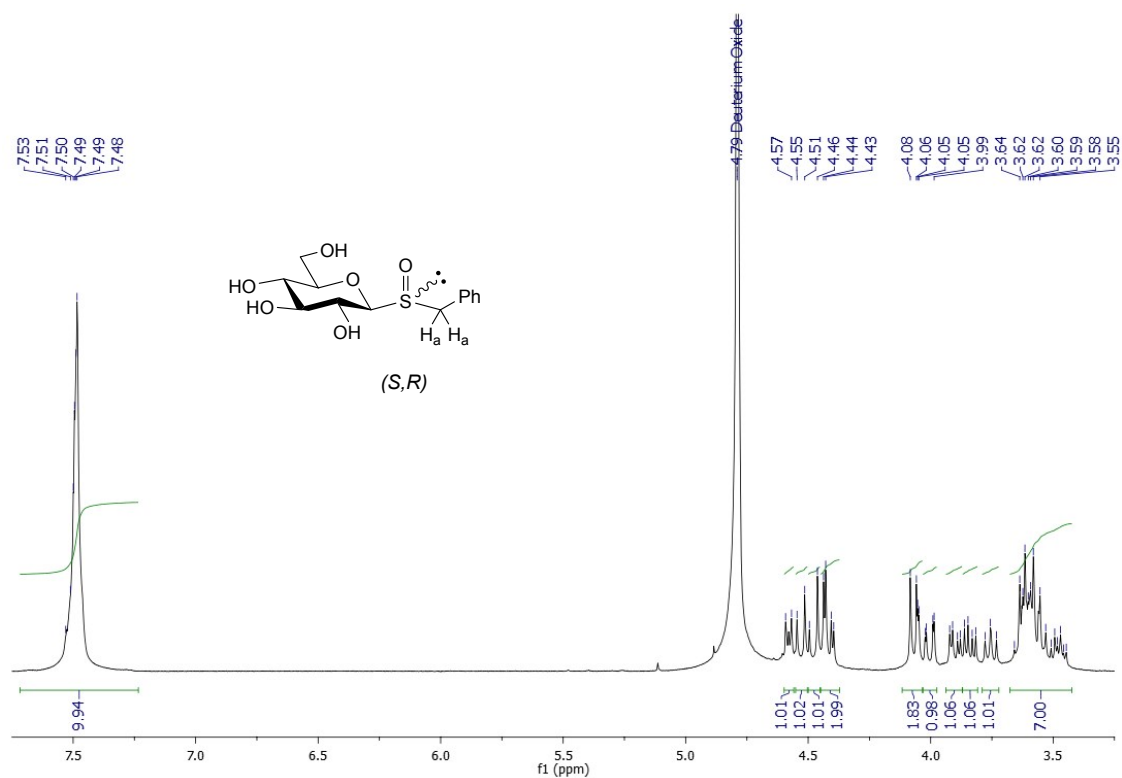

# $^{13}\text{C}$ NMR of compounds **4iR** and **4iS**

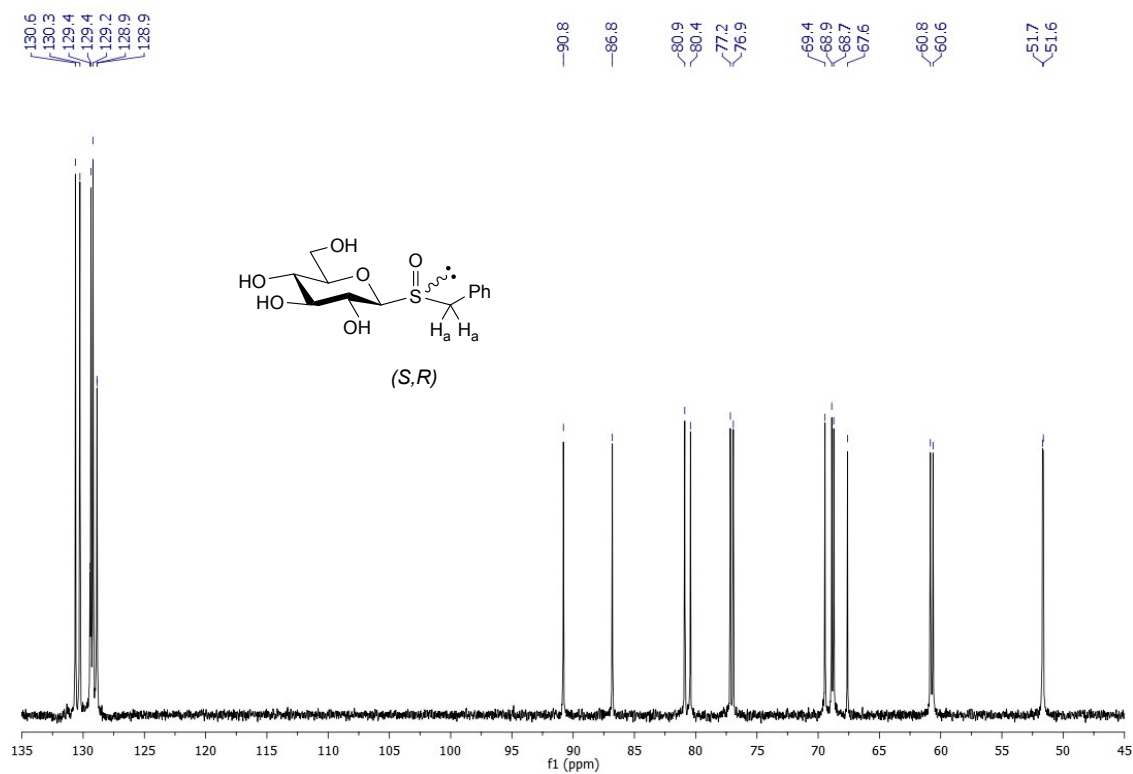

# NOESY of compounds **4iR** and **4iS**

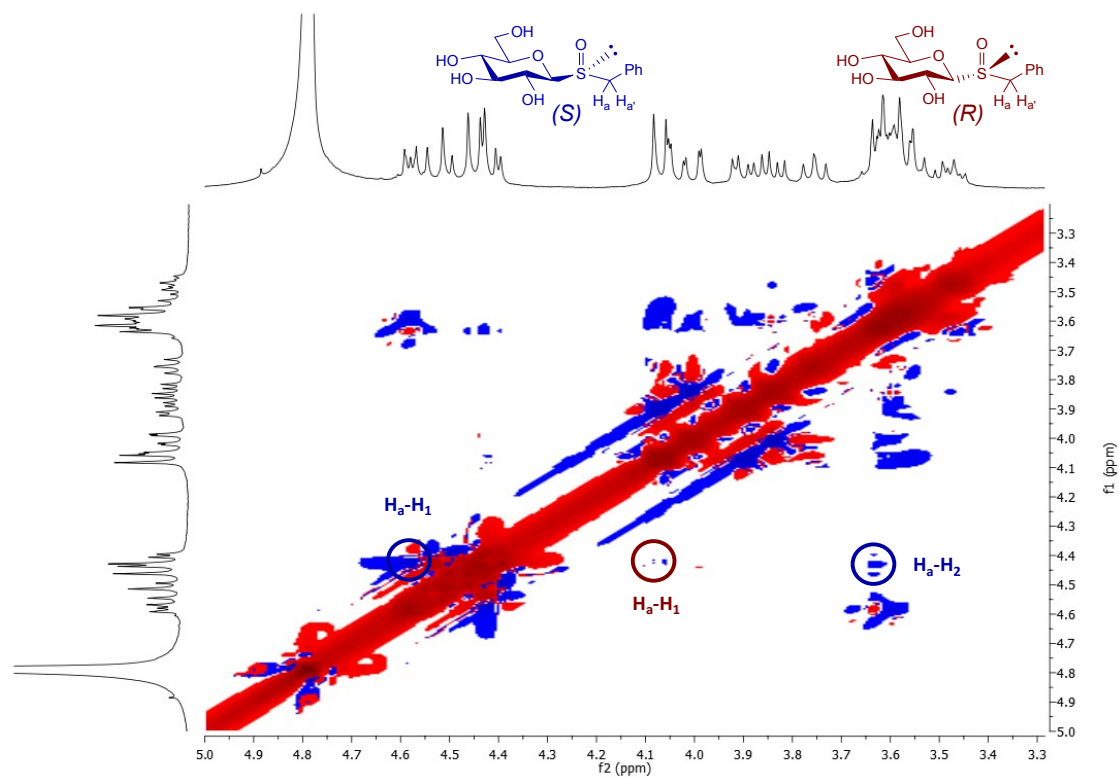



Comparison between  $^1\text{H}$  spectra of penta-O-acetyl-D-glucopyranose and peracetylated fraction obtained after chromatographic column purification in the photooxidation reaction of **3j**

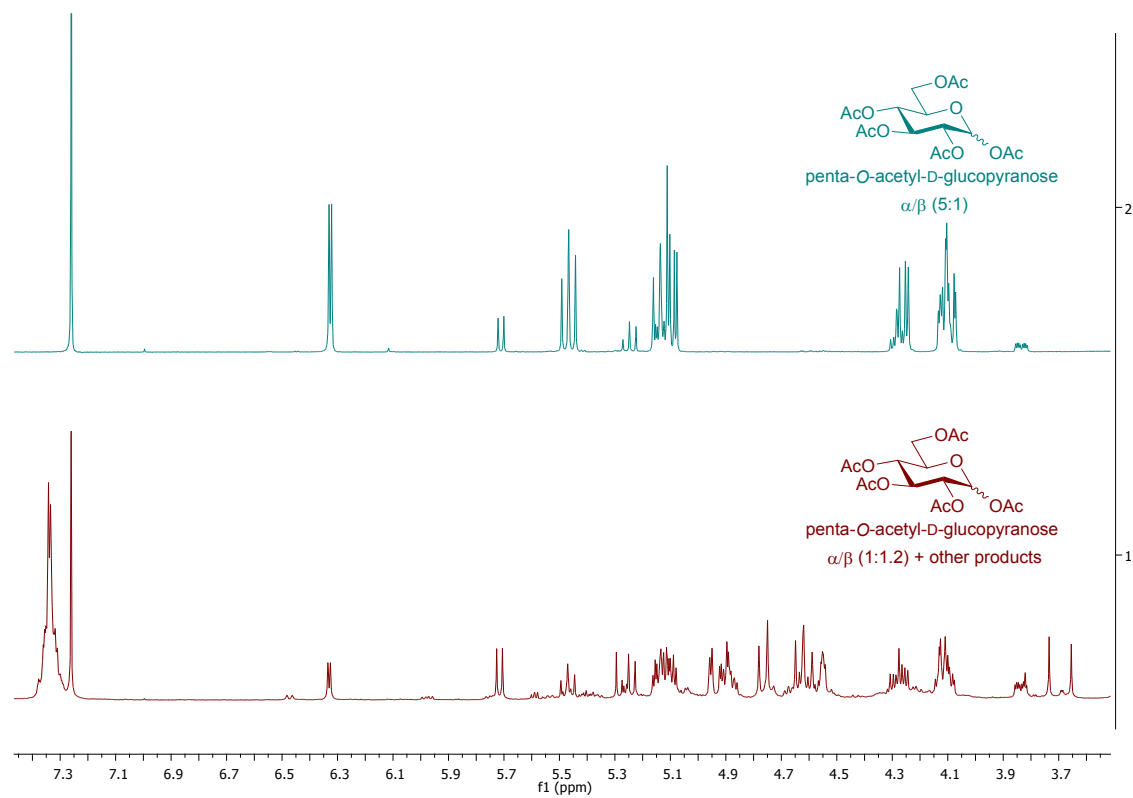

Supplement: d0ra09534f1.pdf [file d0ra09534f1.pdf]
